# Supplementary material for: Vitamin C modulates the metabolic and cytokine profiles, alleviates hepatic endoplasmic reticulum stress, and increases the life span of Gulo−/− mice
Source: Aging (Albany NY). 2016 Feb 20;8(3):458–83. doi: 10.18632/aging.100902 (PMC4833140; doi:10.18632/aging.100902)
Supplement: Supplementary file 3 [file aging-08-458-s003.xlsx]

## Sheet: Amino acids-biogenic amines 
Concentration [µM]	Sample Identification	Material	Sample Description	Ala	Arg	Asn	Asp	Cit	Gln	Glu	Gly	His	Ile	Leu	Lys	Met	Orn	Phe	Pro	Ser	Thr	Trp	Tyr	Val	ADMA	alpha-AAA	Carnosine	Creatinine	DOPA	Dopamine	Histamine	Kynurenine	Met-SO	Nitro-Tyr	OH-Pro	PEA	Putrescine	Sarcosine	SDMA	Serotonin	Spermidine	Spermine	Taurine	total DMA
	WT-1	serum	wild type mouse	513.617	138.892	67.607	14.7727	62.5483	496.029	51.2972	249.865	75.7391	135.803	241.981	293.098	89.49	55.9066	80.1783	145.571	203.292	210.076	96.8963	106.61	237.66	1.11924	1.95703	0.699106	12.6598	0.0255332	0	0.0278594	1.16689	1.6629	0.00820392	0.0337127	0.0011837	0.940784	4.70932	0.24355	3.92126	0.562358	0.0962665	352.721	0.713305
	WT-2	serum	wild type mouse	462.897	134.84	52.6288	13.174	64.496	599.189	46.2438	274.487	65.641	110.376	195.117	247.842	63.8106	46.3608	77.8109	141.514	159.635	181.348	100.681	100.531	207.988	1.01639	2.10965	0.793927	13.2327	0.0197682	0.00115197	0.0189171	1.0146	1.18228	0.00321609	0.0738001	0.00421393	0.880424	4.04179	0.270131	0.701268	0.484043	0.0460198	280.65	0.525797
	WT-3	serum	wild type mouse	634.206	125.594	79.5059	18.899	46.2823	788.615	68.9882	354.871	94.9173	121.043	228.912	252.326	55.6402	79.4358	101.428	140.356	158.504	129.954	110.717	89.43	217.561	1.00385	2.09971	0.498605	12.6758	0.0321667	0.00265571	0.024139	0.989423	1.03386	0.00300872	0.0485792	0.00280377	0.688339	3.21037	0.172513	9.55552	0.635483	0.083183	334.996	0.579386
	WT-4	serum	wild type mouse	433.694	123.53	43.0874	15.8759	53.7324	546.986	53.4259	195.368	47.8946	94.4668	143.724	220.209	47.0534	48.4577	58.9736	102.921	109.205	151.347	79.9625	65.746	168.9	0.837514	1.75433	0.465488	13.0632	0.0298274	0	0.0176619	0.963981	1.10547	0.00812215	0.0098139	0.00306055	0.632905	3.0423	0.184381	2.59704	0.386891	0.0604414	351.636	0.545189
	WT-5	serum	wild type mouse	524.646	150	50.912	31.6041	62.3235	558.24	63.7669	251.447	62.1651	119.948	218.333	254.814	63.7116	58.5294	89.9977	129.179	161.69	250.074	80.0303	95.9985	241.778	1.16797	2.89866	0.955899	16.2764	0.0299103	0.0214906	0.172074	1.02455	1.37018	0.00819695	0.00525041	0.00291957	1.12229	3.97893	0.429641	25.4665	1.5725	0.47202	467.799	0.80199
	WT-6	serum	wild type mouse	1231.02	186.695	106.855	26.5432	96.4468	751.622	76.5729	366.153	100.635	189.483	410.491	393.868	131.996	98.0708	131.039	328.321	262.417	295.394	105.531	130.69	339.671	1.7719	4.34773	0.65049	14.0428	0.0569072	0.00319348	0.0518325	1.21244	3.11365	0.00406379	0.0272851	0.00300159	0.883969	5.2265	0.133886	11.3478	0.432326	0.0857513	513.504	0.918062
	GNV-1	serum	Gulo null with 0% ascorbate	333.293	56.3894	57.4225	17.6102	75.9872	838.986	43.8498	453.268	97.0555	181.143	319.552	259.326	73.2618	119.309	130.064	99.5079	142.988	194.726	74.0089	91.3373	271.328	1.07298	6.20588	3.64179	16.9719	0.0203879	0	1.48941	1.26383	1.88488	0.00350859	0.0119487	0.00681482	0.968943	1.50205	0.351104	5.64918	1.68755	0.364127	356.155	0.897702
	GNV-2	serum	Gulo null with 0% ascorbate	772.822	171.594	76.2956	17.4256	93.1026	882.797	69.1136	497.53	99.994	123.377	214.215	394.574	119.316	77.2854	128.544	237.73	202.204	278.179	108.211	96.2475	211.145	0.866307	11.7813	0.898269	18.1202	0.0325759	0.0256687	1.06683	0.895768	3.22379	0.0169939	0.0388817	0.00614222	0.934369	3.64658	0.204576	12.2335	1.09026	0.293205	392.404	0.615726
	GNV-3	serum	Gulo null with 0% ascorbate	481.238	152.991	54.6429	16.065	48.7789	706.551	38.1748	475.295	87.0496	109.599	193.53	325.256	65.4738	68.5277	85.6251	98.5999	164.649	165.788	70.0861	63.4846	166.001	0.92844	6.1786	0.671159	12.8356	0.00623793	0.00725375	0.241548	0.895559	2.41148	0.00688539	0.055484	0.00480022	0.814176	2.18427	0.275667	10.6125	1.03164	0.203062	362.677	0.676877
	GNV-4	serum	Gulo null with 0% ascorbate	545.352	124.377	54.0865	18.8003	73.4075	744.487	86.9826	436.842	69.9096	115.475	177.489	303.93	73.5328	113.699	82.54	116.303	124.864	168.374	76.4767	95.088	186.689	0.847613	7.51019	0.590542	12.5659	0.0140523	0.0142072	0.4059	0.752483	1.68585	0.00923575	0.0664589	0.00651131	0.939533	3.52657	0.133393	16.8743	1.86918	0.568774	379.693	0.530221
	GNV-5	serum	Gulo null with 0% ascorbate	559.483	108.319	56.994	12.4541	95.3192	731.186	29.021	400.676	90.7478	79.5326	149.487	285.623	88.9248	71.6109	103.473	131.033	202.042	166.083	98.683	70.4564	133.563	0.993427	5.68328	0.78612	13.3825	0.0250856	0.00544494	0.36245	0.637456	2.22352	0.0158484	0.0301271	0.00495092	0.95961	3.00805	0.245311	0.545749	1.12582	0.158762	338.41	0.779012
	GNV-6	serum	Gulo null with 0% ascorbate	858.973	141.903	73.752	11.8592	120.328	812.725	39.0383	688.741	109.693	97.304	177.01	372.279	129.359	158.331	115.014	215.907	225.864	243.232	113.49	102.325	207.349	1.72275	7.42113	0.779226	14.7123	0.0183583	0.0112988	1.00537	0.813107	3.73551	0.000715818	0.101917	0.00580977	0.942521	3.65446	0.283262	15.0615	1.46053	0.402716	332.688	1.03733
	G-1	serum	Gulo null with 0.01% ascorbate	582.398	154.34	55.8831	15.0502	79.4432	837.014	38.6845	398.085	82.3474	133.682	211.367	394.95	72.7723	80.274	107.257	128.993	170.445	309.777	111.82	94.4446	249.846	0.750452	8.33547	0.862246	15.227	0.00974503	0.00427956	0.168582	0.865861	1.9172	0.0139148	0.0441318	0.00672735	1.09294	2.35236	0.266283	3.92883	0.796989	0.103115	314.31	0.631623
	G-2	serum	Gulo null with 0.01% ascorbate	556.186	129.61	54.766	15.8266	122.573	702.095	54.9255	410.117	71.4364	135.377	256.089	348.244	81.9631	82.2359	129.986	151.738	145.609	232.629	114.138	94.2685	260.486	0.781693	8.61493	0.879332	13.8525	0.0267076	0.00329616	0.172525	0.856578	2.46043	0.0117715	0.00300296	0.00649236	0.901746	2.72861	0.183799	5.68569	0.848995	0.138947	391.302	0.50866
	G-3	serum	Gulo null with 0.01% ascorbate	596.28	163.864	66.8231	16.5205	104.955	635.84	77.6369	380.713	99.7039	167.381	322.347	480.955	118.267	128.964	142.798	178.566	167.57	248.421	104.616	118.663	320.413	0.955266	11.1932	0.896633	13.9526	0.0137752	0.00526829	0.175659	0.977985	3.45776	0.00868682	0.0131942	0.00829389	0.98595	2.97325	0.0902229	9.18442	0.732677	0.142602	344.765	0.69132
	G-4	serum	Gulo null with 0.01% ascorbate	1071.56	166.362	132.491	35.3043	88.3527	860.881	84.9419	453.762	128.528	183.586	346.511	416.052	120.18	133.094	166.637	290.704	326.064	253.677	128.733	157.01	338.834	0.842949	5.59707	1.07637	12.2122	0.0171025	0.00619373	0.103173	0.887149	2.77807	0.00877916	0.147956	0.00773553	0.883937	3.83499	0.115256	3.41553	0.728003	0.112385	432.82	0.785952
	G-5	serum	Gulo null with 0.01% ascorbate	475.018	154.153	60.3014	14.5256	115.427	880.962	46.2945	261.007	85.3717	142.288	233.715	370.823	82.8954	76.996	113.667	123.102	170.651	201.193	98.3493	119.067	244.48	0.902042	6.94343	0.973079	14.7661	0.0223555	0.00558585	0.150999	0.929248	2.64019	0	0.0504563	0.006864	1.24206	2.94255	0.17251	4.88173	0.904426	0.101378	375.361	0.65609
	G-6	serum	Gulo null with 0.01% ascorbate	646.365	175.665	80.6754	14.1595	88.1387	642.441	52.4517	475.909	75.7025	140.578	247.249	401.721	93.1742	95.8147	112.288	164.029	201.994	215.393	86.7752	99.8269	243.34	1.20299	8.9357	0.966135	16.2855	0.0114129	0.0141974	0.165889	0.882625	4.54085	0.00103566	0.090187	0.00597755	1.06621	3.00195	0.264959	19.9839	1.35955	0.168834	435.157	0.913339
	GV-1	serum	Gulo null with 0.4% ascorbate	688.398	148.03	104.98	12.8798	115.242	699.245	56.1442	386.553	105.706	139.491	276.385	225.813	77.2254	81.965	127.589	217.596	200.801	136.002	98.8352	126.042	217.806	0.850746	3.98955	0.90939	12.8075	0.0105918	0	0.0605961	1.35514	2.27328	0.00898737	0.022513	0.00729371	0.498365	2.16996	0.204567	6.12129	0.455833	0.112215	374.43	0.64546
	GV-2	serum	Gulo null with 0.4% ascorbate	529.71	164.712	69.2099	18.6628	70.1301	718.819	41.8258	274.067	89.5347	145.284	268.028	332.462	107.239	81.7632	107.379	147.548	144.81	192.92	149.29	98.4856	285.356	0.932543	7.58353	1.24174	14.7482	0.0331122	0	0.160653	1.21813	2.15938	0.0114891	0.0131096	0.00823972	0.694582	2.44459	0.102771	2.60605	0.674444	0.108418	312.846	0.706464
	GV-3	serum	Gulo null with 0.4% ascorbate	578.46	197.471	43.0639	18.062	78.4222	587.775	46.7222	297.885	95.894	140.332	272.616	366.232	113.482	95.4265	113.695	173.21	149	182.41	114.713	103.361	266.74	0.516602	6.68117	0.887421	11.4625	0.0102293	0.00631719	0.107998	0.902397	3.68026	0.00350446	0.0098702	0.00713406	0.532903	3.38958	0.107683	6.58506	0.472689	0.10829	397.537	0.733199
	GV-4	serum	Gulo null with 0.4% ascorbate	601.737	187.604	59.0214	21.8185	93.3181	531.267	42.9351	281.284	78.2697	163.393	314.276	404.654	84.0147	93.2037	108.433	228.058	170.277	227.689	134.791	126.663	299.117	0.679592	9.83548	0.867751	12.9191	0.0198048	0.00700952	0.106515	1.19554	2.52344	0.0113362	0.0670603	0.00673971	0.758741	3.33518	0.158909	9.42295	0.618017	0.0945241	339.801	0.622555
	GV-5	serum	Gulo null with 0.4% ascorbate	618.327	163.811	52.7404	15.1948	99.286	793.627	58.6869	408.433	103.316	144.991	273.844	378.769	102.129	95.3207	118.062	182.112	194.338	243.664	109.832	131.376	262.495	0.931843	8.8009	0.854036	13.482	0.0164524	0.00150563	0.0942339	1.26546	3.03532	0.0199241	0.0340506	0.00552148	0.931039	2.78747	0.256355	0.927425	0.509002	0.0836211	333.531	0.75227
	GV-6	serum	Gulo null with 0.4% ascorbate	619.555	160.127	78.2092	12.3954	83.2575	1021.3	31.9005	485.08	108.806	147.414	311.094	432.752	113.525	104.388	115.334	232.048	171.853	280.252	133.312	147.163	267.045	0.663259	8.27753	1.09578	11.9608	0.0393075	0.00699679	0.179381	1.46803	3.61417	0.00682274	0.132821	0.00632952	0.924729	3.54431	0.0936754	4.87996	0.876966	0.112323	301.37	0.744433
		Mean	wild type mouse	633.347	143.258	66.7661	20.1448	64.3049	623.447	60.0491	282.032	74.4986	128.52	239.76	277.026	75.2836	64.4602	89.9046	164.644	175.79	203.032	95.6364	98.1676	235.593	1.15281	2.52785	0.677253	13.6584	0.0323522	0.00474862	0.0520807	1.06198	1.57806	0.00580194	0.0330736	0.00286385	0.858117	4.03487	0.239017	8.93157	0.678934	0.140614	383.551	0.680621
		Mean	Gulo null with 0% ascorbate	591.86	125.929	62.1989	15.7024	84.4873	786.122	51.03	492.059	92.4082	117.738	205.214	323.498	91.6447	101.461	107.543	149.847	177.102	202.73	90.1593	86.4898	196.013	1.07192	7.46339	1.22785	14.7647	0.0194497	0.0106456	0.761918	0.876367	2.52751	0.00886463	0.0508028	0.00583821	0.926526	2.92033	0.248886	10.1628	1.3775	0.331774	360.338	0.756145
		Mean	Gulo null with 0.01% ascorbate	654.634	157.332	75.1567	18.5645	99.815	759.872	59.1558	396.599	90.515	150.482	269.546	402.124	94.8755	99.563	128.772	172.855	197.055	243.515	107.405	113.88	276.233	0.905899	8.26996	0.942299	14.3827	0.0168498	0.00647016	0.156138	0.899908	2.96575	0.00736465	0.0581546	0.00701511	1.02881	2.97229	0.182172	7.84668	0.895107	0.127877	382.286	0.697831
		Mean	Gulo null with 0.4% ascorbate	606.031	170.293	67.8708	16.5022	89.9425	725.339	46.3691	355.551	96.9212	146.817	286.04	356.78	99.6025	92.0112	115.082	196.762	171.846	210.489	123.462	122.182	266.426	0.762431	7.52803	0.97602	12.8967	0.021583	0.00363819	0.118229	1.23411	2.88097	0.010344	0.0465707	0.00687636	0.723393	2.94518	0.153994	5.09045	0.601159	0.103232	343.252	0.70073
		STDEV	wild type mouse	300.761	23.3382	23.5884	7.34141	17.1857	118.854	11.6431	66.2115	20.1986	32.8259	90.4951	61.7961	31.1976	20.2285	24.5864	81.6657	51.8703	62.0891	12.9737	21.2922	57.2888	0.323988	0.972814	0.183962	1.37842	0.0128076	0.00830814	0.0600838	0.102136	0.785441	0.00262293	0.0254878	0.000970566	0.177386	0.841789	0.105628	9.08404	0.446773	0.163389	88.2054	0.157948
		STDEV	Gulo null with 0% ascorbate	193.081	40.5489	10.0499	2.88651	24.2745	69.1827	22.2019	101.882	13.5318	34.6426	59.9339	51.7106	26.6322	35.3909	20.6212	61.1994	39.1855	47.508	18.9411	15.6825	46.7277	0.329522	2.23825	1.18728	2.3065	0.00905335	0.00883951	0.497714	0.213213	0.796405	0.00654221	0.0314925	0.000820335	0.0565736	0.893857	0.0743803	6.10561	0.349355	0.148483	23.1134	0.187973
		STDEV	Gulo null with 0.01% ascorbate	211.882	15.7978	29.6482	8.24576	17.1512	112.542	18.1868	75.3396	21.0047	20.2833	53.0256	45.4812	19.946	25.2362	22.7803	61.3906	65.7103	37.9959	14.3881	23.9575	42.2025	0.163872	1.8982	0.079937	1.3898	0.00658853	0.00392138	0.0273176	0.0457273	0.91859	0.00566335	0.053683	0.00084967	0.134132	0.487793	0.0734258	6.28565	0.237426	0.0267288	47.9727	0.138681
		STDEV	Gulo null with 0.4% ascorbate	52.387	18.4955	21.9471	3.66229	16.1782	172.956	9.8912	84.8715	11.5136	8.67789	20.8402	72.6363	15.4589	8.75412	7.36006	34.2051	22.8016	50.8108	18.7682	18.2171	27.593	0.168859	2.03703	0.157379	1.1586	0.0120522	0.00348837	0.0439967	0.190854	0.666044	0.00556942	0.047034	0.000922251	0.185826	0.563022	0.065523	3.02041	0.159901	0.0116294	36.617	0.0544417
Measures in gray indicate amounts below the limit of detection
Mean (n=6 mice)
STEDV: standard deviation
Metabolites with a Kruskal-Wallis P-value < 0.01 are highlighted in yellow

## Sheet: Acylcarnitines
Concentration [µM]	Sample Identification	Material	Sample Description	C0	C2	C3	C3-DC (C4-OH)	C3-OH	C3:1	C4	C4:1	C5	C5-DC (C6-OH)	C5-M-DC	C5:1	C5:1-DC	C5-OH (C3-DC-M)	C6 (C4:1-DC)	C6:1	C7-DC	C8	C8:1	C9	C10	C10:1	C10:2	C12	C12-DC	C12:1	C14	C14:1	C14:1-OH	C14:2	C14:2-OH	C16	C16-OH	C16:1	C16:1-OH	C16:2	C16:2-OH	C18	C18:1	C18:1-OH	C18:2
	WT-1	serum	wild type mouse	20.9586	15.909	0.373054	0.122199	0.0155704	0.00391652	0.26682	0.0193868	0.107862	0.0160958	0.0316857	0.0256982	0.00737633	0.0555401	0.064686	0.0196913	0.0140635	0.0897599	0.021848	0.00937291	0.110661	0.0860564	0.0241472	0.0505267	0.0648068	0.075301	0.0679064	0.0764282	0.00826053	0.0176327	0.0110104	0.169829	0.00793907	0.057003	0.00931815	0.0102126	0.0112498	0.0362833	0.128246	0.0124119	0.0686362
	WT-2	serum	wild type mouse	22.459	14.9444	0.47546	0.107022	0.0136804	0.00677682	0.525603	0.0179386	0.108354	0.0168029	0.0267196	0.022284	0.00750617	0.0506163	0.0803196	0.0223837	0.0141988	0.104198	0.0235195	0.0100824	0.102505	0.0831693	0.0259698	0.0414813	0.0575499	0.0675216	0.0552923	0.0649241	0.00819349	0.0131238	0.00856582	0.145921	0.00737051	0.0479375	0.00842965	0.00848723	0.00982318	0.0324824	0.10848	0.0127448	0.0644523
	WT-3	serum	wild type mouse	22.37	15.687	0.419755	0.107296	0.0121154	0.00538744	0.341039	0.0169054	0.135349	0.0119755	0.0284786	0.0159747	0.00525194	0.0448468	0.0740923	0.0172221	0.0107197	0.0936875	0.0220234	0.00762052	0.0868207	0.0687208	0.0200771	0.0420802	0.062567	0.0656537	0.0573638	0.0696784	0.00726888	0.0133648	0.0081195	0.130633	0.00671795	0.0604635	0.0084165	0.00912546	0.00689799	0.0263381	0.116332	0.0115806	0.0532546
	WT-4	serum	wild type mouse	17.9322	13.3395	0.317951	0.101493	0.0123339	0.00563089	0.238082	0.0203053	0.0729795	0.0187937	0.025629	0.0174367	0.00400844	0.0411839	0.0532495	0.0154306	0.0122914	0.0811895	0.0156384	0.0111091	0.0965348	0.068999	0.0194409	0.0426026	0.0570325	0.0659602	0.0519119	0.0621206	0.00829882	0.0107602	0.00795022	0.131973	0.00681599	0.0524382	0.00812813	0.00712778	0.00781315	0.0293352	0.106833	0.0138743	0.0434675
	WT-5	serum	wild type mouse	22.6872	17.3421	0.439503	0.131566	0.0142468	0.00451485	0.499463	0.0167217	0.117033	0.0200766	0.0275032	0.0172053	0.00830601	0.0623712	0.0730841	0.0228508	0.0138923	0.101675	0.0205505	0.010007	0.100057	0.0976329	0.020014	0.0544448	0.0633876	0.0837921	0.0662651	0.0785794	0.0114354	0.0214029	0.0075967	0.186611	0.00887056	0.0707948	0.0104095	0.0126171	0.00977662	0.0442565	0.151486	0.0170152	0.0734748
	WT-6	serum	wild type mouse	24.0613	16.4503	0.362471	0.126109	0.0145362	0.0051117	0.743882	0.0184386	0.133128	0.0135867	0.0220252	0.0174816	0.00739605	0.048469	0.0620605	0.0208687	0.0169055	0.0899358	0.0234024	0.00966102	0.0972548	0.091339	0.0194684	0.0400645	0.0621928	0.0808012	0.033965	0.0782316	0.00670291	0.0106476	0.00946451	0.0905437	0.00787589	0.0372207	0.00828018	0.00591532	0.00796596	0.0261112	0.0691417	0.0115713	0.0311035
	GNV-1	serum	Gulo null with 0% ascorbate	11.6697	26.705	0.209139	0.29373	0.016408	0.00579768	0.250041	0.0211741	0.0800679	0.0222257	0.0190294	0.0207833	0.00846725	0.0357579	0.097616	0.0249364	0.0172147	0.092525	0.0279261	0.0202431	0.0815252	0.117648	0.0310525	0.053817	0.0748523	0.0968916	0.0522542	0.11514	0.0169793	0.0414201	0.0169181	0.17582	0.013932	0.077945	0.0185548	0.0362669	0.0168208	0.0547814	0.350377	0.0279028	0.179141
	GNV-2	serum	Gulo null with 0% ascorbate	32.5679	19.8087	0.876675	0.162786	0.0116452	0.00787565	0.766332	0.0251036	0.170055	0.0164949	0.0244268	0.0230547	0.0109912	0.0621577	0.0810573	0.0389633	0.00979012	0.0935907	0.0366244	0.0144494	0.107607	0.0659146	0.033916	0.0292767	0.0804796	0.0549881	0.0261372	0.0541885	0.00903442	0.0168383	0.0109944	0.0748026	0.0125295	0.0330552	0.00828005	0.0116877	0.0112915	0.0291138	0.0797712	0.014648	0.0552023
	GNV-3	serum	Gulo null with 0% ascorbate	24.9757	11.8226	0.236248	0.120862	0.0153638	0.00643831	0.205607	0.0271529	0.0750828	0.0205327	0.0252953	0.0244781	0.00973225	0.0562177	0.0723679	0.0272703	0.0169257	0.0984398	0.0317345	0.0130079	0.131716	0.0955206	0.0392647	0.0479953	0.0783326	0.0725071	0.0373009	0.0744824	0.0114225	0.0231091	0.0173016	0.135317	0.012341	0.0438831	0.00808634	0.0143978	0.012825	0.0499301	0.128589	0.0145696	0.0724022
	GNV-4	serum	Gulo null with 0% ascorbate	21.2743	11.9207	0.50409	0.133929	0.0114799	0.00461369	0.399292	0.0209713	0.0846745	0.021531	0.0188872	0.0167858	0.00993897	0.0462129	0.0643992	0.0317886	0.0105346	0.0787758	0.0238955	0.0130554	0.0912814	0.0697565	0.0261109	0.0307379	0.0705392	0.0539624	0.0324869	0.0420938	0.00622219	0.0157513	0.0117682	0.0858197	0.00942421	0.0328835	0.00572725	0.00896194	0.0113156	0.0293935	0.0689426	0.0117257	0.0427771
	GNV-5	serum	Gulo null with 0% ascorbate	17.1046	8.79452	0.423871	0.0857048	0.013724	0.00715753	0.271756	0.0175685	0.0727862	0.0146884	0.0177474	0.0147834	0.00828765	0.0393452	0.0534566	0.0242452	0.0130043	0.0857372	0.0271486	0.0123875	0.0901393	0.0731657	0.0305326	0.028312	0.0747882	0.0608907	0.0245814	0.0477064	0.00680293	0.0194349	0.0124071	0.0584937	0.00963752	0.0340621	0.00556957	0.0106718	0.00815572	0.0237636	0.0745257	0.0102368	0.0569881
	GNV-6	serum	Gulo null with 0% ascorbate	20.4773	9.92874	0.438048	0.108762	0.0124178	0.0077551	0.200467	0.0235077	0.066172	0.0154018	0.028941	0.0123556	0.00946385	0.037329	0.0527324	0.0299855	0.0109402	0.0751064	0.0342149	0.0109224	0.0885492	0.0898777	0.0317742	0.0259651	0.0834484	0.0699033	0.0190014	0.0415439	0.00902412	0.0140819	0.0132314	0.0525509	0.0080686	0.0292668	0.00513726	0.00793882	0.0115302	0.0209835	0.0601037	0.00883173	0.0377998
	G-1	serum	Gulo null with 0.01% ascorbate	26.049	16.2233	0.358071	0.172755	0.0151973	0.00841328	0.468872	0.0273432	0.106479	0.0137281	0.0196375	0.0190123	0.00864198	0.0527134	0.0667304	0.0267057	0.0121204	0.107755	0.0316817	0.0239888	0.14252	0.0691018	0.0350279	0.0338993	0.0780805	0.0549832	0.0476551	0.079054	0.0129181	0.0192988	0.0139258	0.130416	0.0120067	0.0615916	0.00916647	0.0130486	0.0125004	0.0372352	0.162828	0.0219276	0.0758722
	G-2	serum	Gulo null with 0.01% ascorbate	23.2961	17.9768	0.418807	0.136214	0.0166578	0.00857317	1.43433	0.0310488	0.114131	0.0179044	0.0193956	0.0131202	0.0065601	0.0604845	0.0783528	0.0259554	0.0133392	0.0662822	0.0303863	0.0177872	0.117497	0.0743442	0.0293085	0.0323024	0.0682356	0.0618511	0.0374991	0.0730676	0.00963238	0.0176513	0.0118043	0.107741	0.00957206	0.0513578	0.00823606	0.00981855	0.0123559	0.034796	0.122718	0.0147505	0.0529612
	G-3	serum	Gulo null with 0.01% ascorbate	22.9412	20.5517	0.514124	0.187444	0.0139548	0.00864478	1.4365	0.0313682	0.148396	0.0167161	0.0235645	0.0214877	0.0145809	0.0605532	0.0839882	0.0280451	0.0152261	0.0791977	0.0234925	0.0162545	0.120617	0.067668	0.031467	0.0371511	0.066431	0.0589745	0.039484	0.0921466	0.00936608	0.0198865	0.0182093	0.119473	0.0120747	0.0525585	0.00883811	0.00982346	0.0129382	0.0349566	0.121952	0.0179988	0.045147
	G-4	serum	Gulo null with 0.01% ascorbate	25.0215	19.385	0.544112	0.151565	0.0199633	0.00902439	0.530627	0.0346341	0.157099	0.0218764	0.0205098	0.021015	0.0111256	0.066563	0.0732414	0.0241305	0.0179157	0.134954	0.0377099	0.0167125	0.136149	0.0741374	0.0292468	0.0423893	0.0809979	0.059956	0.0602427	0.0786293	0.0112251	0.024666	0.0154854	0.130627	0.0112783	0.0692731	0.0112177	0.0148217	0.0132732	0.027835	0.146945	0.0171699	0.0765324
	G-5	serum	Gulo null with 0.01% ascorbate	25.2545	19.3283	0.46994	0.199266	0.0141549	0.0078782	0.512791	0.0352057	0.129618	0.0213231	0.0287297	0.0162963	0.0138272	0.0641754	0.0777023	0.0252702	0.0129609	0.0943703	0.0314333	0.0175734	0.125143	0.0548388	0.0239826	0.04533	0.0701346	0.042383	0.0473479	0.0912161	0.0147485	0.0229937	0.0170154	0.150565	0.0117813	0.0629046	0.0097035	0.0201195	0.0177052	0.0426921	0.166107	0.0190512	0.0852363
	G-6	serum	Gulo null with 0.01% ascorbate	23.0533	18.2441	0.468294	0.176068	0.0184013	0.00792125	0.706842	0.0248639	0.127867	0.0178736	0.0216055	0.0165572	0.00722921	0.0589665	0.0765245	0.0224309	0.0112978	0.0683159	0.0249319	0.0182291	0.10961	0.0601095	0.0261801	0.0360363	0.0670454	0.0577903	0.0406857	0.0815659	0.00767754	0.0183603	0.0136119	0.124365	0.0104995	0.0543749	0.00880203	0.0102353	0.0126623	0.0377362	0.139509	0.01887	0.0630285
	GV-1	serum	Gulo null with 0.4% ascorbate	27.2855	18.1753	0.384662	0.124035	0.0176769	0.00877767	0.297664	0.0312095	0.0949856	0.0196758	0.0202225	0.0169733	0.00734667	0.0698119	0.060808	0.0283269	0.0135226	0.0981599	0.0269711	0.0173044	0.131423	0.0511275	0.0256582	0.0384868	0.0604025	0.0505208	0.0399627	0.0621913	0.00791061	0.0149383	0.0131869	0.09933	0.0117317	0.0482982	0.00731605	0.0118476	0.0103023	0.0285033	0.0953531	0.0162458	0.0566065
	GV-2	serum	Gulo null with 0.4% ascorbate	26.2424	18.3568	0.323177	0.160809	0.0175852	0.0101301	0.661204	0.0352142	0.120307	0.023826	0.0255669	0.0175537	0.0135979	0.0589988	0.0621972	0.0275203	0.0122482	0.0936125	0.0336652	0.0186732	0.141875	0.0578786	0.0280098	0.0361399	0.0744125	0.0547748	0.04393	0.0807323	0.0123954	0.019506	0.0137557	0.124609	0.0138371	0.0681994	0.0085824	0.0127409	0.0146577	0.0380345	0.155504	0.0227071	0.0668828
	GV-3	serum	Gulo null with 0.4% ascorbate	24.1738	20.7355	0.362326	0.129273	0.0133889	0.00937381	0.665954	0.0334092	0.116553	0.0169275	0.0207315	0.0167629	0.00714888	0.0583768	0.0580694	0.0273094	0.0141656	0.0805421	0.0316075	0.0183159	0.126664	0.0793168	0.0375145	0.0359403	0.0734756	0.0825319	0.0376485	0.0790909	0.0104509	0.0179944	0.0147013	0.10023	0.0109197	0.0452674	0.00846257	0.00893841	0.0119963	0.0313021	0.102888	0.0162153	0.0473311
	GV-4	serum	Gulo null with 0.4% ascorbate	23.3823	17.7319	0.381254	0.159707	0.0152935	0.0101165	0.672982	0.0359135	0.128966	0.0174141	0.0230683	0.022029	0.00951252	0.057038	0.0570127	0.0282222	0.0116202	0.0832316	0.0317208	0.0202667	0.126617	0.0539621	0.0297391	0.0389688	0.077468	0.0533101	0.0338641	0.0731894	0.00971242	0.0196376	0.0137703	0.113768	0.0124408	0.0491309	0.00841218	0.00730424	0.0110162	0.0294115	0.111765	0.0156823	0.0473428
	GV-5	serum	Gulo null with 0.4% ascorbate	26.6449	19.1964	0.408729	0.184748	0.0172764	0.00938569	0.525703	0.0252692	0.12158	0.0189629	0.0214568	0.0177951	0.00593171	0.059114	0.0725759	0.0236894	0.0105912	0.0980597	0.0301533	0.0164458	0.114977	0.0848277	0.0320692	0.0368231	0.0761447	0.0608493	0.0379522	0.067408	0.0084222	0.0191058	0.0147636	0.108302	0.0112884	0.0425393	0.00730226	0.0122668	0.0135695	0.0315987	0.113351	0.0144142	0.0594584
	GV-6	serum	Gulo null with 0.4% ascorbate	23.1992	15.9043	0.431604	0.128737	0.0196281	0.00762774	0.865727	0.0242701	0.138905	0.0197536	0.0179568	0.0208219	0.00871615	0.0596286	0.070416	0.0238584	0.0124627	0.825492	0.0370513	0.0195844	0.330752	0.0916981	0.0355888	0.0340112	0.0766001	0.0699141	0.0319375	0.0687424	0.0114493	0.0151495	0.0148052	0.0995844	0.00961298	0.0378423	0.00859212	0.00941105	0.0120507	0.0340547	0.0915748	0.0139087	0.0554983
		Mean	wild type mouse	21.7447	15.612	0.398032	0.115947	0.0137472	0.00522304	0.435815	0.0182827	0.112451	0.0162219	0.0270069	0.0193467	0.00664082	0.0505045	0.0679153	0.0197412	0.0136785	0.0934076	0.0211637	0.00964216	0.0989723	0.0826529	0.0215196	0.0452	0.0612561	0.0731716	0.0554507	0.0716604	0.00836001	0.0144887	0.00878453	0.142585	0.00759833	0.0543096	0.00883035	0.00891425	0.00892112	0.0324678	0.11342	0.0131997	0.0557315
		Mean	Gulo null with 0% ascorbate	21.3449	14.83	0.448012	0.150962	0.0135064	0.00660633	0.348916	0.0225797	0.0914731	0.0184791	0.0223879	0.0187068	0.00948019	0.0461701	0.0702716	0.0295315	0.0130683	0.0873625	0.0302573	0.014011	0.0984697	0.0853139	0.0321085	0.0360173	0.0770734	0.0681906	0.0319603	0.0625258	0.00991423	0.0217726	0.0137701	0.097134	0.0109888	0.0418493	0.00855922	0.0149875	0.0119898	0.034661	0.127051	0.0146524	0.0740517
		Mean	Gulo null with 0.01% ascorbate	24.2693	18.6182	0.462225	0.170552	0.0163882	0.00840918	0.848328	0.030744	0.130598	0.018237	0.0222404	0.0179148	0.0103275	0.060576	0.0760899	0.025423	0.01381	0.0918126	0.0299393	0.0184243	0.125256	0.0667	0.0292022	0.0378514	0.0718208	0.0559897	0.0454858	0.0826132	0.0109279	0.0204761	0.0150087	0.127198	0.0112021	0.0586768	0.00932731	0.0129779	0.0135725	0.0358752	0.143343	0.0182947	0.0664629
		Mean	Gulo null with 0.4% ascorbate	25.1547	18.35	0.381959	0.147885	0.0168082	0.00923525	0.614872	0.0308809	0.120216	0.0194266	0.0215005	0.018656	0.00870897	0.0604947	0.0635132	0.0264878	0.0124351	0.213183	0.0318615	0.0184317	0.162051	0.0698018	0.03143	0.0367283	0.0730839	0.0619835	0.0375492	0.0718924	0.0100568	0.0177219	0.0141638	0.107637	0.0116385	0.0485463	0.00811126	0.0104182	0.0122655	0.0321508	0.111739	0.0165289	0.05552
		STDEV	wild type mouse	2.1123	1.3711	0.0574252	0.0122452	0.00133122	0.000982703	0.191655	0.00139903	0.0226657	0.00305948	0.00319695	0.0037961	0.00164265	0.00760543	0.00978295	0.00292758	0.00207638	0.0084793	0.00292145	0.00115228	0.00783378	0.0117663	0.0028137	0.00583988	0.00320378	0.00794969	0.0122469	0.00712881	0.00163928	0.00423018	0.00126603	0.0336315	0.000806317	0.0114282	0.000878552	0.00235835	0.00162489	0.00694732	0.0272237	0.00205494	0.0162511
		STDEV	Gulo null with 0% ascorbate	7.09206	6.98227	0.240617	0.074509	0.00203334	0.00125598	0.216831	0.00340058	0.0390114	0.003327	0.00448603	0.00481549	0.00100056	0.0108602	0.0172818	0.00544851	0.00327936	0.0091075	0.00477402	0.00325962	0.0184142	0.0196797	0.00433958	0.0117816	0.00461909	0.0159709	0.0118062	0.0284888	0.003926	0.0101294	0.00269226	0.048491	0.00226565	0.0183506	0.00507704	0.0106646	0.00282453	0.0141586	0.112009	0.00689237	0.052887
		STDEV	Gulo null with 0.01% ascorbate	1.33367	1.49116	0.0666762	0.023172	0.00241802	0.000442926	0.461925	0.00404137	0.0193929	0.00302174	0.00352508	0.00319475	0.00339441	0.00475856	0.00576206	0.00197234	0.00240709	0.0264005	0.00514753	0.0028203	0.0121921	0.00780483	0.00388481	0.00503423	0.00617985	0.0070483	0.00835213	0.00755843	0.00258181	0.00275983	0.00236176	0.0142435	0.000990031	0.00704498	0.00104374	0.00404625	0.0020508	0.00486696	0.0190184	0.00236709	0.0154326
		STDEV	Gulo null with 0.4% ascorbate	1.78166	1.60007	0.0374963	0.0242798	0.00216865	0.00093943	0.189543	0.00501597	0.0146811	0.00245089	0.00259915	0.00221087	0.00270372	0.00465059	0.00649188	0.00213896	0.00128663	0.300061	0.00337954	0.00141296	0.083101	0.017536	0.00452981	0.00181497	0.00638264	0.0122066	0.00428445	0.00715244	0.00172975	0.00215444	0.000683491	0.0101467	0.00143025	0.0104696	0.00062514	0.00217975	0.00160974	0.00346629	0.0231145	0.003175	0.00747969
Measures in gray indicate amounts below the limit of detection
Mean (n=6 mice)
STEDV: standard deviation
Metabolites with a Kruskal-Wallis P-value < 0.01 are highlighted in yellow

## Sheet: Lysophosphatidycholines
Concentration [µM]	Sample Identification	Material	Sample Description	lysoPC a C14:0	lysoPC a C16:0	lysoPC a C16:1	lysoPC a C17:0	lysoPC a C18:0	lysoPC a C18:1	lysoPC a C18:2	lysoPC a C20:3	lysoPC a C20:4	lysoPC a C24:0	lysoPC a C26:0	lysoPC a C26:1	lysoPC a C28:0	lysoPC a C28:1
	WT-1	serum	wild type mouse	3.40801	208.965	5.37104	2.92635	81.1537	38.6013	158.674	7.11813	35.1876	0.562868	0.159021	0.0798096	0.185653	0.152618
	WT-2	serum	wild type mouse	3.47187	202.994	5.25609	3.16821	82.2971	37.3701	153.546	6.55365	32.8897	0.556955	0.100189	0.0559754	0.154436	0.116149
	WT-3	serum	wild type mouse	3.10849	170.23	6.33591	2.43121	74.3016	44.7589	150.566	9.84445	50.626	0.473222	0.109586	0.0513283	0.17894	0.130199
	WT-4	serum	wild type mouse	3.22607	177.098	5.7542	2.18092	70.8408	37.8546	138.228	8.95412	34.8089	0.435479	0.112158	0.0529636	0.156618	0.120051
	WT-5	serum	wild type mouse	2.60673	158.128	4.87732	2.1071	62.0169	39.5682	155.12	9.64195	39.3376	0.579654	0.194028	0.100611	0.190789	0.170352
	WT-6	serum	wild type mouse	3.60994	234.579	9.23006	3.20086	99.1788	63.783	207.033	18.504	56.185	0.505256	0.164842	0.0745015	0.183579	0.149003
	GNV-1	serum	Gulo null with 0% ascorbate	2.16723	143.596	3.18392	2.62664	40.0862	24.1255	67.8392	1.3816	25.2856	0.661154	0.238315	0.155801	0.170251	0.25767
	GNV-2	serum	Gulo null with 0% ascorbate	2.86739	176.019	5.3413	2.6087	58.3138	40.0397	155.524	11.003	35.7152	0.447826	0.19634	0.0608696	0.191686	0.154348
	GNV-3	serum	Gulo null with 0% ascorbate	2.57466	213.286	6.87273	2.9026	69.4451	65.1658	166.36	16.0765	67.1714	0.795423	0.213679	0.120941	0.167663	0.202344
	GNV-4	serum	Gulo null with 0% ascorbate	2.77027	153.6	5.10886	2.08146	45.8417	43.0848	136.899	11.9578	45.3041	0.493619	0.127093	0.0713213	0.146252	0.112613
	GNV-5	serum	Gulo null with 0% ascorbate	2.82977	136.373	4.02705	2.37775	43.3933	30.9223	118.385	4.98025	31.5383	0.532332	0.0961874	0.0466958	0.121936	0.0747133
	GNV-6	serum	Gulo null with 0% ascorbate	2.43552	135.536	2.9326	2.69304	49.5218	27.2871	94.8535	2.76168	22.3629	0.539008	0.0867895	0.0838457	0.115769	0.117783
	G-1	serum	Gulo null with 0.01% ascorbate	3.21477	222.091	8.24897	3.30597	91.8201	66.9107	168.149	19.2265	59.6033	0.533516	0.161366	0.0843593	0.182954	0.159599
	G-2	serum	Gulo null with 0.01% ascorbate	3.02131	261.256	11.7994	2.62064	93.7614	99.6518	203.654	26.6823	68.4311	0.560946	0.196685	0.114788	0.241291	0.210084
	G-3	serum	Gulo null with 0.01% ascorbate	3.22859	298.36	11.0695	3.14966	116.383	108.724	229.536	32.7925	68.4861	0.747336	0.480092	0.219515	0.509197	0.419298
	G-4	serum	Gulo null with 0.01% ascorbate	2.96024	180.184	10.085	2.49606	56.3825	60.7467	190.263	13.5267	49.4329	0.41382	0.135917	0.0700648	0.180925	0.172972
	G-5	serum	Gulo null with 0.01% ascorbate	3.29289	258.919	10.1913	3.14005	89.4621	83.017	197.837	25.369	61.7868	0.680808	0.16283	0.0648388	0.223566	0.219989
	G-6	serum	Gulo null with 0.01% ascorbate	2.7724	224.42	7.88178	3.05217	84.1114	70.4665	173.49	18.9995	57.0804	0.593185	0.213531	0.122003	0.2069	0.17459
	GV-1	serum	Gulo null with 0.4% ascorbate	3.08057	179.675	9.88583	2.55493	53.2278	57.6008	175.683	12.8882	46.9625	0.467471	0.133856	0.0667816	0.169873	0.131409
	GV-2	serum	Gulo null with 0.4% ascorbate	2.9958	247.522	8.77027	2.878	91.1363	63.3705	179.256	18.5172	49.2355	0.561279	0.134143	0.0739132	0.205977	0.163995
	GV-3	serum	Gulo null with 0.4% ascorbate	2.55601	239.587	8.71163	2.78366	86.9606	67.9524	186.893	15.8866	47.852	0.525177	0.157272	0.0833972	0.181327	0.151017
	GV-4	serum	Gulo null with 0.4% ascorbate	2.8737	239.123	8.0272	2.55041	82.8339	62.3165	168.871	17.0576	44.1496	0.557977	0.142715	0.09579	0.187257	0.134106
	GV-5	serum	Gulo null with 0.4% ascorbate	3.20726	231.89	7.11647	3.0133	81.2754	55.8259	192.456	15.9302	57.0218	0.660386	0.269675	0.161633	0.26866	0.327884
	GV-6	serum	Gulo null with 0.4% ascorbate	2.60428	224.65	7.05244	2.81306	74.4681	53.8594	172.722	14.0194	47.4419	0.626346	0.403028	0.241748	0.302264	0.338447
		Mean	wild type mouse	3.23852	191.999	6.13744	2.66911	78.2982	43.656	160.528	10.1027	41.5058	0.518905	0.139971	0.0691981	0.175003	0.139729
		Mean	Gulo null with 0% ascorbate	2.60747	159.735	4.57775	2.54836	51.1003	38.4375	123.31	8.0268	37.8962	0.578227	0.159734	0.0899124	0.15226	0.153245
		Mean	Gulo null with 0.01% ascorbate	3.0817	240.872	9.8793	2.96076	88.6534	81.5861	193.821	22.7661	60.8034	0.588268	0.22507	0.112595	0.257472	0.226089
		Mean	Gulo null with 0.4% ascorbate	2.88627	227.074	8.26064	2.76556	78.317	60.1542	179.313	15.7165	48.7772	0.566439	0.206782	0.120544	0.219226	0.20781
		STDEV	wild type mouse	0.357031	28.513	1.5939	0.49169	12.6239	10.2151	23.8356	4.32859	9.61626	0.0571037	0.0379027	0.0194175	0.0155735	0.0210902
		STDEV	Gulo null with 0% ascorbate	0.27127	30.2072	1.48893	0.284004	10.9492	14.9947	37.3811	5.83558	16.4767	0.127952	0.0645748	0.0409821	0.0296736	0.0669214
		STDEV	Gulo null with 0.01% ascorbate	0.198972	40.8717	1.54213	0.32465	19.3275	19.1739	22.2416	6.8516	7.2493	0.116676	0.12795	0.0572919	0.125496	0.0974858
		STDEV	Gulo null with 0.4% ascorbate	0.261354	24.4769	1.08883	0.182896	13.5091	5.30495	8.89798	2.02962	4.37104	0.069297	0.109196	0.0684633	0.0536816	0.0978758
Measures in gray indicate amounts below the limit of detection
Mean (n=6 mice)
STEDV: standard deviation
Metabolites with a Kruskal-Wallis P-value < 0.01 are highlighted in yellow

## Sheet: Phosphatidylcholines
Concentration [µM]	Sample Identification	Material	Sample Description	PC aa C24:0	PC aa C26:0	PC aa C28:1	PC aa C30:0	PC aa C30:2	PC aa C32:0	PC aa C32:1	PC aa C32:2	PC aa C32:3	PC aa C34:1	PC aa C34:2	PC aa C34:3	PC aa C34:4	PC aa C36:0	PC aa C36:1	PC aa C36:2	PC aa C36:3	PC aa C36:4	PC aa C36:5	PC aa C36:6	PC aa C38:0	PC aa C38:1	PC aa C38:3	PC aa C38:4	PC aa C38:5	PC aa C38:6	PC aa C40:1	PC aa C40:2	PC aa C40:3	PC aa C40:4	PC aa C40:5	PC aa C40:6	PC aa C42:0	PC aa C42:1	PC aa C42:2	PC aa C42:4	PC aa C42:5	PC aa C42:6	PC ae C30:0	PC ae C30:1	PC ae C30:2	PC ae C32:1	PC ae C32:2	PC ae C34:0	PC ae C34:1	PC ae C34:2
	WT-1	serum	wild type mouse	0.0593618	0.589378	0.146092	0.937283	0	12.888	6.80889	1.85029	0.188756	154.835	378.737	30.0076	1.0259	2.19791	37.7695	271.243	121.263	210.072	12.1777	0.574686	2.12866	0.570648	31.5944	122.115	42.5377	156.362	0.342101	0.756319	1.04983	3.82449	6.83504	43.3027	0.12754	0.134682	0.364439	0.412247	0.47043	1.84156	0.167096	0.150604	0.0828753	0.824864	0.34687	0.520637	4.26662	7.11572
	WT-2	serum	wild type mouse	0.0420853	0.552417	0.115261	0.932287	0	11.0682	6.59586	1.96486	0.210116	148.449	368.903	29.3278	1.04007	2.11997	37.5778	266.376	105	193.185	11.5089	0.570601	1.96542	0.306368	27.1068	109.975	36.278	133.934	0.346348	0.669641	0.92599	3.57946	6.20275	39.1975	0.110601	0.11633	0.339418	0.413956	0.440669	1.80338	0.166723	0.111022	0.0636967	0.662451	0.322043	0.528312	4.26596	6.90257
	WT-3	serum	wild type mouse	0.0560993	0.54585	0.12631	0.91043	0	13.3248	7.29463	1.61876	0.158994	130.574	308.797	22.1402	0.943638	2.07377	38.7127	245.025	116.999	191.656	10.9105	0.546402	1.69694	0.559583	35.7299	128.694	50.5676	123.315	0.314074	0.581524	1.02113	3.70618	7.7088	35.5966	0.127936	0.103181	0.289215	0.343461	0.419361	1.4704	0.150726	0.0533615	0.053346	0.640572	0.260072	0.498275	3.63628	4.55335
	WT-4	serum	wild type mouse	0.0539845	0.557507	0.115634	0.785122	0	11.7292	8.23032	1.68402	0.166956	142.818	319.22	25.9035	0.918965	1.98166	35.8397	233.986	107.714	184.531	11.5303	0.52667	1.4896	0.530661	32.2651	111.489	39.3335	129.459	0.304046	0.584762	0.954781	3.48664	6.64958	38.0414	0.105975	0.104804	0.293588	0.328019	0.434459	1.58714	0.150318	0.0901355	0.0623155	0.597247	0.26812	0.43875	3.46547	4.81523
	WT-5	serum	wild type mouse	0.0716417	0.640631	0.145948	0.919603	0	12.1986	10.3157	2.34961	0.208408	156.627	314.977	33.0738	1.29973	1.88455	35.955	225.636	107.355	190.226	13.6131	0.659842	1.85002	0.664389	29.7276	107.464	42.8053	132.239	0.341089	0.61016	0.952548	3.58176	6.88325	35.7736	0.120091	0.104602	0.335644	0.342115	0.431	1.63849	0.165591	0.0909745	0.0757863	0.695465	0.310519	0.453196	4.04968	6.13479
	WT-6	serum	wild type mouse	0.0691454	0.577265	0.147774	1.01772	0	13.4911	11.8907	2.63648	0.153812	195.165	404.623	31.4657	1.41288	2.16047	53.7917	319.424	174.532	240.237	18.3648	0.93968	2.04872	0.813768	55.4539	148.817	67.0534	169.636	0.343553	0.723822	1.39938	4.95394	10.7195	48.8101	0.124322	0.104835	0.3694	0.395074	0.522981	1.93352	0.166332	0.0803677	0.0616382	0.696878	0.297117	0.471619	4.13131	5.17647
	GNV-1	serum	Gulo null with 0% ascorbate	0.126579	0.828281	0.168772	0.680545	0	10.7021	4.20205	0.942072	0.1369	90.5265	348.329	14.8915	0.524685	1.94794	11.7506	160.376	77.0146	184.804	8.90308	0.414589	3.19759	0.598817	11.0625	99.271	42.9162	205.947	0.305417	0.255894	0.272826	1.23248	4.15523	45.4335	0.12712	0.108901	0.205056	0.220826	0.199427	0.413102	0.156085	0.123197	0.0876316	0.681786	0.16334	0.350021	3.30043	3.4634
	GNV-2	serum	Gulo null with 0% ascorbate	0.083054	0.679132	0.179338	0.69798	0	12.5634	4.03924	1.17308	0.122459	80.5167	419.193	22.5056	0.708371	2.44967	15.4265	245.898	134.813	164.163	10.8718	0.577722	2.36436	0.422669	29.6537	87.9371	42.652	144.541	0.312491	0.337644	0.516947	1.56383	4.38799	30.3221	0.127611	0.144431	0.177262	0.248195	0.224759	0.744861	0.116467	0.0421469	0.0617393	0.618536	0.21109	0.433265	3.40233	4.71492
	GNV-3	serum	Gulo null with 0% ascorbate	0.0933005	0.816586	0.195683	1.21106	0	22.9857	13.3359	3.12445	0.180798	221.837	557.375	43.9791	1.91021	2.70323	30.0348	300.721	186.998	291.621	20.5883	1.07939	2.73457	0.808302	41.0218	132.805	86.0345	198.197	0.369026	0.556244	0.942598	3.02154	9.33866	35.4899	0.131116	0.12694	0.309722	0.311911	0.412499	1.16129	0.157437	0.0683587	0.0842182	0.730035	0.265476	0.578177	5.56621	5.69019
	GNV-4	serum	Gulo null with 0% ascorbate	0.0584058	0.686433	0.123374	0.775148	0	10.1138	5.56442	1.49674	0.114618	113.53	396.479	18.8992	0.808929	2.14396	18.9019	245.251	123.629	176.167	10.6826	0.566292	1.59146	0.214136	27.9719	80.2922	47.7559	105.296	0.28741	0.431516	0.798214	2.34612	5.51558	19.925	0.0952756	0.0732586	0.262242	0.244513	0.321948	0.802092	0.132777	0.0931097	0.0794057	0.520756	0.228637	0.38555	3.02348	3.78462
	GNV-5	serum	Gulo null with 0% ascorbate	0.0393982	0.610672	0.110192	0.683159	0	9.26183	3.21533	1.12798	0.0965906	58.8962	349.736	13.9794	0.656702	1.92557	11.0296	204.026	103.156	128.231	7.39235	0.460974	2.10495	0.372124	15.3849	55.7628	31.0257	80.0722	0.283374	0.303371	0.324595	1.13804	2.79747	14.1037	0.101729	0.0989014	0.19661	0.165274	0.151488	0.440425	0.0996047	0.0731713	0.0566349	0.603306	0.197182	0.328621	3.08209	4.48637
	GNV-6	serum	Gulo null with 0% ascorbate	0.0559565	0.610376	0.104195	0.707163	0	9.40911	2.80161	0.81466	0.0798772	50.9092	333.175	8.52502	0.403528	2.38324	11.3028	213.068	101.976	110.107	4.80444	0.338931	2.95119	0.551407	13.5986	52.5038	23.8414	76.2268	0.294498	0.283577	0.276099	0.984757	2.46824	18.7468	0.1148	0.106693	0.202356	0.183812	0.154753	0.394142	0.137363	0.0528432	0.0662473	0.753381	0.213598	0.336106	3.50928	4.14694
	G-1	serum	Gulo null with 0.01% ascorbate	0.0908689	0.679394	0.174095	0.988	0	15.0231	7.82909	1.93394	0.209581	161.182	483.954	26.5762	1.1052	3.43471	37.7345	348.77	184.398	245.061	14.4434	0.774559	2.17839	0.609408	58.4756	181.426	81.2121	192.617	0.364832	0.562125	1.03492	3.47544	10.3455	57.1778	0.131011	0.097632	0.235214	0.339584	0.399116	1.16564	0.1455	0.053118	0.0959644	0.657558	0.301556	0.535018	3.81272	4.27506
	G-2	serum	Gulo null with 0.01% ascorbate	0.104896	0.776708	0.218599	0.989332	0	16.5173	13.8853	1.98773	0.171465	252.271	526.545	28.8145	1.11192	3.40304	54.7466	369.66	225.32	275.029	17.4844	0.841538	1.92518	1.12173	74.0243	181.849	97.353	181.475	0.369938	0.63483	1.2971	4.302	14.0026	52.4508	0.134518	0.121558	0.256826	0.325445	0.41432	1.28263	0.139815	0.137462	0.0952869	0.671234	0.265734	0.497767	4.09989	4.02029
	G-3	serum	Gulo null with 0.01% ascorbate	0.169631	1.23785	0.361269	1.14498	0	18.6859	14.9238	2.07393	0.21621	318.525	651.189	30.2273	1.16058	4.33152	72.3115	468.745	261.646	327.958	21.1135	0.882993	2.55452	1.68731	92.9077	211.478	100.955	224.338	0.395572	0.848375	1.71113	5.5988	16.8495	70.8048	0.178648	0.126733	0.374433	0.463981	0.571764	1.74161	0.236738	0.206447	0.123785	0.848845	0.422479	0.599096	5.23591	5.16073
	G-4	serum	Gulo null with 0.01% ascorbate	0.0556687	0.683134	0.148715	1.14485	0	13.4827	11.9765	2.14984	0.1652	163.237	505.714	27.9836	1.09364	2.68874	33.0953	356.414	170.382	226.593	15.0078	0.705502	1.6307	0.472549	38.8118	109.812	57.4703	116.387	0.281476	0.62392	1.07363	2.88186	7.11583	26.5943	0.117738	0.0911012	0.298658	0.291064	0.402518	0.987734	0.175335	0.0941367	0.0946367	0.696963	0.342663	0.484349	3.73436	5.59412
	G-5	serum	Gulo null with 0.01% ascorbate	0.0736314	0.736314	0.197777	1.07485	0	18.1977	13.1516	2.18181	0.201168	261.593	612.534	37.6339	1.35216	3.33357	57.9777	413.002	246.207	314.893	21.3654	0.978749	2.47911	0.9865	78.2806	192.641	101.118	212.224	0.398961	0.805722	1.63669	5.1645	14.6294	57.5123	0.131896	0.111592	0.365257	0.471498	0.637775	1.75387	0.141422	0.067196	0.0881864	0.827553	0.40628	0.630372	5.21268	5.52431
	G-6	serum	Gulo null with 0.01% ascorbate	0.126586	0.764265	0.245261	0.965984	0	17.9276	8.95502	1.72605	0.170605	199.62	545.348	31.1044	1.05122	3.51637	45.6438	364.778	211.065	279.724	16.3052	0.72405	2.35411	1.07456	62.0907	171.311	86.8814	187.37	0.405857	0.760355	1.31075	3.91728	11.507	51.4371	0.150272	0.12015	0.346291	0.392154	0.469341	1.30511	0.181817	0.0799938	0.114719	0.723144	0.37533	0.595105	4.41571	5.23101
	GV-1	serum	Gulo null with 0.4% ascorbate	0.0495863	0.658568	0.153408	1.04631	0	13.6965	9.77194	1.83425	0.15964	150.107	475.755	26.785	0.944593	2.58736	30.3634	331.662	167.389	201.323	13.737	0.618825	1.69071	0.478688	34.9296	91.932	55.1317	108.797	0.309691	0.548484	0.908067	2.43336	6.54936	22.6657	0.104137	0.108091	0.29976	0.247785	0.348988	0.951251	0.141787	0.0966523	0.075929	0.611142	0.292789	0.4848	3.81482	5.62197
	GV-2	serum	Gulo null with 0.4% ascorbate	0.0960575	0.664049	0.184597	1.01771	0	16.5169	12.5188	2.15628	0.154667	227.457	613.619	33.3039	1.2562	3.25061	46.0493	404.91	204.995	288.101	21.9785	0.913709	2.35987	1.00291	64.08	170.194	79.8913	215.748	0.366172	0.658735	1.52313	4.54822	11.6007	60.3869	0.158138	0.104401	0.301035	0.382625	0.50423	1.84111	0.153869	0.0606698	0.0918811	0.753197	0.307071	0.561985	4.54006	5.51558
	GV-3	serum	Gulo null with 0.4% ascorbate	0.0818838	0.788671	0.183592	1.03595	0	16.8752	14.349	2.01527	0.174335	255.042	642.028	29.6404	1.0765	3.14451	47.5479	416.882	200.793	278.754	18.1751	0.773422	2.23898	1.13106	57.4741	158.23	70.1727	196.306	0.327141	0.68461	1.30522	3.91155	9.88515	56.8563	0.140718	0.105833	0.311927	0.412884	0.477473	1.71374	0.144641	0.0961399	0.0853316	0.645904	0.231404	0.561488	4.379	5.21957
	GV-4	serum	Gulo null with 0.4% ascorbate	0.0662919	0.731863	0.14319	1.01983	0	14.9386	13.4094	2.01805	0.172022	229.932	605.031	28.1293	1.06922	3.16611	44.0985	388.693	191.402	267.904	20.2186	0.861251	1.89466	0.887588	58.4506	153.862	68.8794	188.403	0.336151	0.591772	1.34077	3.88903	10.578	55.4259	0.140216	0.132377	0.239095	0.347834	0.398666	1.60776	0.14667	0.0752097	0.0963442	0.619316	0.276971	0.520306	4.05168	4.72351
	GV-5	serum	Gulo null with 0.4% ascorbate	0.134594	1.01444	0.258387	1.03803	0	14.5786	9.85593	2.02447	0.195024	189.243	615.302	31.1091	1.19173	3.32641	37.2382	404.458	183.448	301.727	18.1884	0.811332	2.40411	0.639273	52.6849	172.821	72.7115	203.552	0.37737	0.742682	1.37666	4.50686	10.3339	53.6318	0.146096	0.138442	0.336453	0.405738	0.51923	1.72405	0.207883	0.204297	0.126286	0.724011	0.330498	0.508604	4.14551	6.09837
	GV-6	serum	Gulo null with 0.4% ascorbate	0.184687	1.35382	0.319905	1.12411	0	15.6375	9.8262	2.16972	0.192331	194.163	610.882	32.6807	1.23153	3.29626	38.0714	396.875	189.969	291.104	17.8422	0.831822	2.25258	0.859806	47.1651	151.921	71.1344	181.926	0.409226	0.758964	1.26531	3.90566	9.43817	43.931	0.141887	0.0992301	0.400626	0.404018	0.561014	1.45162	0.211603	0.289976	0.114605	0.811801	0.353494	0.57449	4.28647	6.22482
		Mean	wild type mouse	0.0587197	0.577175	0.132836	0.917075	0	12.45	8.52267	2.01734	0.181174	154.745	349.21	28.6531	1.10687	2.06972	39.9411	260.282	122.144	201.651	13.0176	0.636313	1.86323	0.574236	35.313	121.426	46.4293	140.824	0.331868	0.654371	1.05061	3.85541	7.49982	40.1203	0.119411	0.111406	0.331951	0.372479	0.45315	1.71241	0.161131	0.0960775	0.0666096	0.686246	0.30079	0.485132	3.96922	5.78302
		Mean	Gulo null with 0% ascorbate	0.0761157	0.705247	0.146926	0.792508	0	12.506	5.52643	1.4465	0.121874	102.703	400.715	20.4633	0.835403	2.25893	16.4077	228.223	121.264	175.849	10.5404	0.572983	2.49069	0.494576	23.1156	84.762	45.7043	135.047	0.308703	0.361374	0.52188	1.71446	4.7772	27.3368	0.116275	0.109854	0.225541	0.229089	0.244146	0.659318	0.133289	0.0754711	0.0726462	0.6513	0.21322	0.401957	3.6473	4.38107
		Mean	Gulo null with 0.01% ascorbate	0.103547	0.812944	0.224286	1.05133	0	16.639	11.7869	2.00888	0.189038	226.071	554.214	30.39	1.14579	3.45132	50.2516	386.895	216.503	278.21	17.62	0.817898	2.187	0.99201	67.4318	174.753	87.4984	185.735	0.369439	0.705888	1.34404	4.22331	12.4083	52.6628	0.14068	0.111461	0.31278	0.380621	0.482472	1.37277	0.170105	0.106392	0.102096	0.737549	0.35234	0.556951	4.41855	4.96759
		Mean	Gulo null with 0.4% ascorbate	0.102183	0.868569	0.20718	1.04699	0	15.3739	11.6219	2.03634	0.17467	207.657	593.769	30.2747	1.12829	3.12855	40.5615	390.58	189.666	271.486	18.3566	0.801727	2.14015	0.83322	52.464	149.827	69.6535	182.455	0.354292	0.664208	1.28653	3.86578	9.73087	48.8163	0.138532	0.114729	0.314816	0.366814	0.468267	1.54825	0.167742	0.137157	0.0983961	0.694229	0.298705	0.535279	4.20292	5.5673
		STDEV	wild type mouse	0.0107896	0.0350902	0.0156088	0.0751429	0	0.952154	2.13548	0.398589	0.0248178	21.9246	40.0868	3.99304	0.201896	0.117686	6.87547	33.999	26.4297	20.7604	2.7778	0.155439	0.237791	0.166963	10.2712	15.6742	11.1728	18.0467	0.0180369	0.0742382	0.177108	0.550821	1.6515	5.10238	0.00918124	0.012383	0.0341332	0.0388668	0.0382425	0.175254	0.00823384	0.0326474	0.0107364	0.0774416	0.0328892	0.0364736	0.338781	1.09269
		STDEV	Gulo null with 0% ascorbate	0.0314904	0.0964517	0.0390771	0.20794	0	5.27102	3.94261	0.854158	0.0350822	62.5336	83.4342	12.4517	0.54535	0.306689	7.34241	47.4903	37.863	63.5761	5.41446	0.26417	0.590698	0.205588	11.684	29.7666	21.6392	57.3968	0.0314985	0.113137	0.288009	0.80339	2.49564	11.8888	0.014974	0.0243211	0.0501167	0.0522552	0.103294	0.302829	0.0225267	0.0292139	0.0128096	0.087141	0.033818	0.0945671	0.958145	0.786006
		STDEV	Gulo null with 0.01% ascorbate	0.0406147	0.212032	0.0750593	0.0814954	0	2.04296	2.82225	0.167369	0.0224692	62.2164	64.7122	3.89432	0.10702	0.524782	14.4138	45.9344	35.1722	38.9771	2.99647	0.103911	0.353956	0.429729	18.6442	34.6203	16.7648	37.6011	0.0461294	0.114605	0.28014	1.02337	3.4721	14.52	0.0213007	0.0142581	0.0583518	0.0749525	0.10025	0.311493	0.037283	0.0569171	0.0138768	0.0814107	0.0608783	0.0597954	0.668643	0.661233
		STDEV	Gulo null with 0.4% ascorbate	0.09276	0.213383	0.0767371	0.114401	0	1.56996	1.02973	0.198972	0.0339128	14.1738	69.6405	3.67906	0.17706	0.646499	6.1693	53.9613	19.5828	49.7499	2.37416	0.0981409	0.394504	0.477772	9.85163	60.7719	14.7017	33.2991	0.073685	0.173808	0.228971	0.687275	2.12139	13.9677	0.0328808	0.0171513	0.0798619	0.0775102	0.10306	0.280921	0.0390133	0.0395358	0.0338384	0.0628055	0.0469372	0.0511646	0.288144	0.866586
Measures in gray indicate amounts below the limit of detection
Mean (n=6 mice)
STEDV: standard deviation
Metabolites with a Kruskal-Wallis P-value < 0.01 are highlighted in yellow
[truncated: 31 more columns]

## Sheet: Shingomyelins
Concentration [µM]	Sample Identification	Material	Sample Description	SM (OH) C14:1	SM (OH) C16:1	SM (OH) C22:1	SM (OH) C22:2	SM (OH) C24:1	SM C16:0	SM C16:1	SM C18:0	SM C18:1	SM C20:2	SM C22:3	SM C24:0	SM C24:1	SM C26:0	SM C26:1
	WT-1	serum	wild type mouse	1.26493	0.378914	3.62602	2.36554	0.306833	23.6182	5.13525	2.21171	0.919278	0.00487049	0.0121495	13.5068	17.306	0.0185712	0.00963371
	WT-2	serum	wild type mouse	1.15471	0.364983	3.65449	1.98846	0.278303	20.4898	4.67574	2.03526	0.75733	0.0146447	0.12947	13.4277	13.5786	0.0100757	0
	WT-3	serum	wild type mouse	1.2343	0.281359	2.26468	1.93991	0.214361	21.0285	3.65069	1.37671	0.595131	0.0201897	0.0835725	9.59657	13.1746	0	0
	WT-4	serum	wild type mouse	0.996393	0.27024	2.16435	1.65385	0.239693	18.6856	4.11504	1.68365	0.738667	0.0477741	0.0291913	10.2077	11.1902	0	0
	WT-5	serum	wild type mouse	1.07248	0.294547	3.0187	1.97865	0.305208	19.2085	4.00658	1.8814	0.738842	0.00289773	0	11.7766	14.4419	0.0199139	0
	WT-6	serum	wild type mouse	1.49792	0.263732	2.21374	1.90739	0.230861	19.8443	4.3034	1.57288	0.787538	0.0215979	0	11.2154	8.02973	0.0165342	0.0184498
	GNV-1	serum	Gulo null with 0% ascorbate	1.18191	0.421155	1.93195	1.4694	0.222182	21.5695	3.69748	2.77733	1.06821	0.0647851	0	4.06119	12.1646	0.0185349	0.0358571
	GNV-2	serum	Gulo null with 0% ascorbate	1.45964	0.346089	2.53933	1.89868	0.346575	25.3983	4.55613	2.14488	0.878202	0.114983	0.0539137	7.07568	17.5921	0.00365416	0.0463388
	GNV-3	serum	Gulo null with 0% ascorbate	1.15262	0.339896	2.72445	2.08598	0.244808	22.6978	4.95338	2.23319	0.763301	0.0296768	0	10.1551	21.4383	0.0485749	0
	GNV-4	serum	Gulo null with 0% ascorbate	0.960122	0.209179	1.90132	1.78628	0.200633	16.0611	3.75757	1.3187	0.556375	0.0525143	0	7.65786	13.6627	0.0260322	0
	GNV-5	serum	Gulo null with 0% ascorbate	0.882792	0.355499	1.89313	1.46705	0.305838	19.7244	3.5924	1.92656	0.716033	0.030141	0	5.23819	12.408	0	0.00982597
	GNV-6	serum	Gulo null with 0% ascorbate	0.963635	0.459278	1.66625	1.39631	0.270211	22.015	4.28662	2.71451	1.02631	0.0387614	0.0269281	4.4474	12.2079	0.0183855	0.0178488
	G-1	serum	Gulo null with 0.01% ascorbate	1.56731	0.314852	2.9055	2.52104	0.283466	22.0889	4.18808	1.95703	0.9339	0.104057	0	10.4154	15.7794	0.00326686	0
	G-2	serum	Gulo null with 0.01% ascorbate	1.35247	0.255961	2.47997	2.20722	0.355682	19.5184	3.98318	1.73667	0.757623	0.113395	0	11.7729	13.0656	0.0619589	0.010059
	G-3	serum	Gulo null with 0.01% ascorbate	1.70418	0.311055	2.30526	2.56643	0.305631	23.5842	5.12606	2.04417	0.96317	0.0630356	0	14.0836	12.394	0.0392087	0
	G-4	serum	Gulo null with 0.01% ascorbate	1.48463	0.291308	1.89574	1.77481	0.180692	17.744	2.6825	1.51206	0.573876	0.0522302	0	8.83613	7.61583	0.0301435	0
	G-5	serum	Gulo null with 0.01% ascorbate	1.86005	0.319714	2.91958	2.91536	0.34495	24.039	5.5259	2.03747	0.869784	0.0933927	0	14.6552	14.8585	0.02217	0.0129679
	G-6	serum	Gulo null with 0.01% ascorbate	1.77482	0.31328	2.58961	2.94868	0.35486	22.6862	4.60252	2.10228	0.914144	0.110736	0	11.6193	16.7	0	0
	GV-1	serum	Gulo null with 0.4% ascorbate	1.32276	0.291079	1.28944	1.88712	0.162784	17.1033	2.6071	1.47869	0.579608	0.0614983	0	8.29546	9.2771	0.0352492	0.0419317
	GV-2	serum	Gulo null with 0.4% ascorbate	1.65521	0.316957	2.38722	2.08043	0.212404	20.6429	4.29194	1.98274	0.937391	0.0606868	0	11.6944	10.9178	0	0
	GV-3	serum	Gulo null with 0.4% ascorbate	1.35892	0.323585	1.78655	1.72149	0.204326	17.4442	3.77346	1.46689	0.730532	0.0817298	0	10.5531	8.00379	0.0409292	0
	GV-4	serum	Gulo null with 0.4% ascorbate	1.44418	0.262813	1.90491	1.91226	0.200562	17.7844	3.55699	1.58531	0.778149	0.0659535	0	10.6665	8.77902	0.0225288	0
	GV-5	serum	Gulo null with 0.4% ascorbate	1.32468	0.289794	2.15122	1.93438	0.163093	18.1629	4.41147	1.5194	0.705931	0.0444347	0	11.3624	10.2201	0.0207979	0
	GV-6	serum	Gulo null with 0.4% ascorbate	1.32	0.336346	1.98592	2.09733	0.244	18.2784	3.89491	1.68202	0.753279	0.055806	0	10.2984	11.7595	0	0
		Mean	wild type mouse	1.20346	0.308962	2.82366	1.9723	0.262543	20.4791	4.31445	1.7936	0.756131	0.0186624	0.0423972	11.6218	12.9535	0.0108492	0.00468058
		Mean	Gulo null with 0% ascorbate	1.10012	0.355183	2.1094	1.68395	0.265041	21.2443	4.1406	2.18586	0.83474	0.0551437	0.0134736	6.43923	14.9123	0.019197	0.0183118
		Mean	Gulo null with 0.01% ascorbate	1.62391	0.301028	2.51594	2.48892	0.304213	21.6101	4.35137	1.89828	0.835416	0.0894745	0	11.8971	13.4022	0.0261247	0.00383782
		Mean	Gulo null with 0.4% ascorbate	1.40429	0.303429	1.91754	1.93883	0.197861	18.236	3.75598	1.61918	0.747482	0.0616849	0	10.4784	9.82623	0.0199175	0.00698862
		STDEV	wild type mouse	0.175411	0.0500928	0.705869	0.228738	0.039693	1.75441	0.525259	0.308393	0.104048	0.0162069	0.0528421	1.61893	3.12896	0.00905678	0.00776859
		STDEV	Gulo null with 0% ascorbate	0.211734	0.0858158	0.419777	0.28072	0.0542835	3.13825	0.547392	0.538966	0.194824	0.0323194	0.0225503	2.31356	3.80701	0.0174412	0.0191636
		STDEV	Gulo null with 0.01% ascorbate	0.190401	0.0241514	0.387413	0.444876	0.0671766	2.47006	0.99901	0.228478	0.14687	0.0258396	0	2.19297	3.26371	0.0232037	0.00601625
		STDEV	Gulo null with 0.4% ascorbate	0.13168	0.303429	1.91754	1.93883	0.197861	18.236	3.75598	1.61918	0.747482	0.0616849	0	10.4784	9.82623	0.0199175	0.00698862
Measures in gray indicate amounts below the limit of detection
Mean (n=6 mice)
STEDV: standard deviation
Metabolites with a Kruskal-Wallis P-value < 0.01 are highlighted in yellow

## Sheet: Hexoses
Concentration [µM]	Sample Identification	Material	Sample Description	H1
	WT-1	serum	wild type mouse	17900.5
	WT-2	serum	wild type mouse	14278.8
	WT-3	serum	wild type mouse	12471
	WT-4	serum	wild type mouse	14834.6
	WT-5	serum	wild type mouse	14723.5
	WT-6	serum	wild type mouse	17130.4
	GNV-1	serum	Gulo null with 0% ascorbate	6686.53
	GNV-2	serum	Gulo null with 0% ascorbate	12764.4
	GNV-3	serum	Gulo null with 0% ascorbate	12671.6
	GNV-4	serum	Gulo null with 0% ascorbate	10825.7
	GNV-5	serum	Gulo null with 0% ascorbate	7866.83
	GNV-6	serum	Gulo null with 0% ascorbate	9923.68
	G-1	serum	Gulo null with 0.01% ascorbate	17293.1
	G-2	serum	Gulo null with 0.01% ascorbate	14952.9
	G-3	serum	Gulo null with 0.01% ascorbate	18234.9
	G-4	serum	Gulo null with 0.01% ascorbate	16325.8
	G-5	serum	Gulo null with 0.01% ascorbate	18498.6
	G-6	serum	Gulo null with 0.01% ascorbate	15719.3
	GV-1	serum	Gulo null with 0.4% ascorbate	15188
	GV-2	serum	Gulo null with 0.4% ascorbate	17412.1
	GV-3	serum	Gulo null with 0.4% ascorbate	16754.9
	GV-4	serum	Gulo null with 0.4% ascorbate	16381.4
	GV-5	serum	Gulo null with 0.4% ascorbate	16219.8
	GV-6	serum	Gulo null with 0.4% ascorbate	13324.5
		Mean	wild type mouse	15223.1
		Mean	Gulo null with 0% ascorbate	10123.1
		Mean	Gulo null with 0.01% ascorbate	16837.4
		Mean	Gulo null with 0.4% ascorbate	15880.1
		STDEV	wild type mouse	1983.57
		STDEV	Gulo null with 0% ascorbate	2486.17
		STDEV	Gulo null with 0.01% ascorbate	1413.07
		STDEV	Gulo null with 0.4% ascorbate	1448.39
Measures in gray indicate amounts below the limit of detection
Mean (n=6 mice)
STEDV: standard deviation
Metabolites with a Kruskal-Wallis P-value < 0.01 are highlighted in yellow

## Sheet: Prostaglandins
Concentration [nM]	Sample Identification	Material	Sample Description	12S-HETE	13S-HODE	14(15)-EpETE	15S-HETE	15S-HpETE	5S-HpETE	6-keto-PGF1a	8-iso PGF2a	9-HODE	AA	DHA	LTB4	LTD4	PGD2	PGE2	PGF2a	TXB2
	WT-1	serum	wild type mouse	113.696	19.9366	0.0867402	1.35714	0.0794712	0.124637	4.04323	0	13.8629	11020.7	8224.01	0.577666	0.0974931	0	50.4639	4.00941	4.9026
	WT-2	serum	wild type mouse	19.2435	21.3249	0.0458329	0.671279	0.181476	0.178864	2.24601	0	13.0141	11644.6	8076.41	0.411404	0.129556	0	62.7752	3.3129	0.711066
	WT-3	serum	wild type mouse	83.1686	23.4746	0.00281077	1.13803	0.22633	0.0723977	2.35732	0	11.4716	14694.6	9178	0.536592	0.0418659	0.750041	17.5155	4.13202	0.511201
	WT-4	serum	wild type mouse	51.2753	13.8802	0.0443097	1.0355	0.045438	0.0339285	1.96606	0	7.92707	11856.1	7094.87	0.290326	0.0602665	0.757381	35.0088	3.68508	1.10926
	WT-5	serum	wild type mouse	1517.15	34.5308	0.0959818	12.7115	0.184376	0.291324	3.47198	0.125404	21.1279	25627.7	9693.43	2.34006	0.331321	4.02585	30.601	6.00533	44.041
	WT-6	serum	wild type mouse	381.356	64.6674	0.0789363	1.85304	0.209076	0.321125	3.25597	0	29.8568	14381.3	6751.9	0.446847	0.0477316	0.858709	69.2155	4.1472	6.90351
	GNV-1	serum	Gulo null with 0% ascorbate	942.86	192.008	0.237174	27.8897	0.101694	0.128983	10.5913	0	52.9773	39927.7	23872.6	1.09319	0.00496448	4.73736	32.7901	4.17606	4.19806
	GNV-2	serum	Gulo null with 0% ascorbate	1391.11	84.0191	0.0600398	16.8271	0	0.335832	11.8892	0	33.7962	15026.7	9089.15	0.578039	0.0129121	4.34731	15.5145	5.80698	66.5878
	GNV-3	serum	Gulo null with 0% ascorbate	81.5075	20.3289	0.0607566	2.83845	0	0.271835	3.84694	0	14.8275	16263.8	8900.38	0.349467	0.254454	0	163.185	4.02271	1.26019
	GNV-4	serum	Gulo null with 0% ascorbate	1904.85	77.9128	0.0333411	16.1474	0	0.158707	24.5159	0	29.7341	16241.4	9729.5	0.727135	0.032909	0	128.292	6.05646	58.0545
	GNV-5	serum	Gulo null with 0% ascorbate	77.8886	71.1901	0.030724	1.94665	0.100345	0.165564	6.72277	0	36.2855	15153.3	10884	0.280495	0.0198127	0	104.89	3.83209	1.93352
	GNV-6	serum	Gulo null with 0% ascorbate	809.458	40.6583	0.0402046	10.4178	0.093644	0.0677261	17.8931	0	27.0003	8862.6	6923.12	0.672344	0.083176	0	171.441	4.68086	38.6703
	G-1	serum	Gulo null with 0.01% ascorbate	69.7844	27.5855	0.0511829	1.16804	0.142294	0.0674253	2.84373	0.168772	12.4908	15236	9502.16	0.0490495	0.0241359	0	25.4982	3.64685	0.981294
	G-2	serum	Gulo null with 0.01% ascorbate	168.558	61.7942	0.050608	1.8986	0.167494	0.130526	2.51495	0	26.4836	22301.7	10115.9	0.0959074	0.0106964	0	45.7814	3.49765	2.71186
	G-3	serum	Gulo null with 0.01% ascorbate	580.177	38.1613	0.0426746	3.13247	0	0.205781	4.65612	0	16.5547	13402.2	7087.61	0.324754	0.00522601	0	60.0135	3.90496	10.473
	G-4	serum	Gulo null with 0.01% ascorbate	45.4642	42.2379	0.0266454	0.717155	0.115231	0.172191	5.54693	0	13.6589	8749.72	5547.21	0.132171	0.0127696	0	177.135	3.71426	0.53228
	G-5	serum	Gulo null with 0.01% ascorbate	75.3039	28.2116	0.0345696	0.972942	0.107062	0.0749103	3.30817	0.101118	10.694	14731.3	9507.07	0.302132	0.00774944	0	55.7142	3.6329	1.31071
	G-6	serum	Gulo null with 0.01% ascorbate	1119.29	57.073	0.0626438	7.45121	0	0	5.13691	0	25.6072	15174.6	8777.89	0.351991	0.0321741	0	33.8547	4.43892	26.8694
	GV-1	serum	Gulo null with 0.4% ascorbate	92.8907	24.601	0.0294869	0.952019	0.15855	0.0725122	2.90169	0	8.19696	7488.56	4940.83	0.0786934	0.027448	0	314.523	3.94958	1.45765
	GV-2	serum	Gulo null with 0.4% ascorbate	27.8078	32.5976	0.0766332	0.679917	0	0.0757566	2.39852	0	13.5218	14128.9	9834.82	0.0535311	0.0132941	0	55.8053	3.36283	0.665358
	GV-3	serum	Gulo null with 0.4% ascorbate	44.2347	47.6881	0.093193	0.731385	0	0.164632	2.33507	0	17.5058	13656.8	8361.94	0.137331	0.0109218	0	114.302	3.75915	1.24308
	GV-4	serum	Gulo null with 0.4% ascorbate	76.6615	39.4363	0.0706352	0.86384	0	0.057974	2.44577	0	12.4731	11643.7	7086.3	0.0466825	0.0310741	0	75.1764	3.69013	1.446
	GV-5	serum	Gulo null with 0.4% ascorbate	39.3349	28.5553	0.054251	0.722704	0.177357	0.0760118	4.10098	0	11.8566	12327.4	8528.21	0.0641401	0.0112843	0	318.549	3.39076	0.647005
	GV-6	serum	Gulo null with 0.4% ascorbate	56.0262	49.7625	0.092471	0.751764	0	0.11377	3.60518	0	19.2852	17684.8	10506.8	0.0439327	0.00754757	0	317.964	3.43168	1.14828
		Mean	wild type mouse	360.981	29.6357	0.0591019	3.12775	0.154361	0.170379	2.89009	0.0209006	16.21	14870.8	8169.77	0.76715	0.118039	1.06533	44.2633	4.21532	9.69644
		Mean	Gulo null with 0% ascorbate	867.947	81.0195	0.07704	12.6779	0.0492805	0.188108	12.5765	0	32.4368	18579.2	11566.5	0.616778	0.068038	1.51411	102.685	4.76253	28.4507
		Mean	Gulo null with 0.01% ascorbate	343.096	42.5106	0.0447207	2.55674	0.0886799	0.108472	4.00114	0.0449816	17.5815	14932.6	8422.98	0.209334	0.0154586	0	66.3329	3.80592	7.14644
		Mean	Gulo null with 0.4% ascorbate	56.1593	37.1068	0.0694451	0.783605	0.0559844	0.0934429	2.96453	0	13.8066	12821.7	8209.83	0.0707185	0.0169283	0	199.387	3.59736	1.10123
		STDEV	wild type mouse	581.063	18.4419	0.034874	4.71126	0.0738676	0.116392	0.819111	0.0511959	7.96496	5482.7	1141.53	0.777127	0.109661	1.50143	19.9575	0.933127	17.0246
		STDEV	Gulo null with 0% ascorbate	721.192	59.5752	0.0795093	9.77482	0.0540529	0.098176	7.5591	0	12.5341	10819.9	6165.82	0.292669	0.0954536	2.34889	65.6234	0.951713	29.8863
		STDEV	Gulo null with 0.01% ascorbate	429.916	14.3536	0.0128966	2.55113	0.0719126	0.0756213	1.2757	0.0728954	6.83306	4360.4	1754.15	0.131754	0.0104762	0	55.8114	0.337393	10.3493
		STDEV	Gulo null with 0.4% ascorbate	24.4893	10.2705	0.0243916	0.102958	0.0869344	0.0394815	0.733702	0	4.02066	3350.54	1999.5	0.0350278	0.009797	0	130.23	0.238321	0.364566
Measures in gray indicate amounts below the limit of detection
Mean (n=6 mice)
STEDV: standard deviation
Metabolites with a Kruskal-Wallis P-value < 0.01 are highlighted in yellow
