# Supplementary material for: Vitamin C modulates the metabolic and cytokine profiles, alleviates hepatic endoplasmic reticulum stress, and increases the life span of Gulo−/− mice
Source: Aging (Albany NY). 2016 Feb 20;8(3):458–83. doi: 10.18632/aging.100902 (PMC4833140; doi:10.18632/aging.100902)
Supplement: Supplementary file 4 [file aging-08-458-s004.xlsx]

## Sheet: Table S3
Sample Identification	Material	Sample Description	Cytokines (pg/mL)	IL-1a	IL-1b	IL-2	IL-3	IL-4	IL-5	IL-6	IL-10	IL-12(p40)	IL-12(p70)	IL-13	IL-15	IL-17	IL-18	G-CSF	GM-CSF	M-CSF	LIF	IFN-g	KC	MCP-1	MIP-1a	MIP-1b	MIP-2	MIG	Eotaxin	RANTES	TNF-a	Cardiovascular risk factors (ng/mL)	sE-Selectin	sICAM-1	Pecam-1	sP-selectin	PAI-1	proMMP-9	Thrombomodulin	FGF-basic	PDGF-bb	VEGF	Metabolic hormones (pg/mL)	C-peptide 2	GIP	Leptin	Resistin
WT-1	serum	Wild type		19.41	377.61	42.03	31.97	18.64	22.48	11.31	79.14	231.49	456.96	618.62	498.89	132.49	1160.74	146.82	99.77	1656.71	46.2	37.27	30.86	270.58	21.13	57.06	15.38	276.05	726.4	20.97	478.34		472.11	69.45	24.44	1538.89	1.5	41.47	29.35	227.68	1584.67	54.61		1037.75	35.53	738.7	1874.01
WT-2	serum	Wild type		16.29	551.99	23.67	41.58	28.48	26.5	28.65	142.1	264.6	887.37	1119.83	203.84	110.62	592.39	239.72	195.88	1806.21	10.04	62.95	71.63	418.36	36.84	77.88	2.43	107.55	1059.26	22.84	668.01		658.33	41.22	15.94	1141.84	1.17	12.81	23.51	33.65	114.51	20.12		948.05	7.78	787.08	5485.04
WT-3	serum	Wild type		7.26	349.94	16.72	19.71	15.72	20.13	16.04	63.86	169.67	389.49	536.3	260.35	93.24	684.31	223.52	OOR <	1269.52	15.72	18.22	114.97	228.85	20.75	46.58	3.86	135.87	OOR <	7.94	393.19		284.09	24.68	10.49	580.67	0.67	5.77	14.69	52.52	215.52	18.72		1660.82	38.4	1630.87	1305.33
WT-4	serum	Wild type		13.44	416.53	44.96	35.91	23.34	23.54	16.58	72.6	187.54	599.67	715.48	405.61	46.52	874.09	185.4	143.12	1574.17	30.98	47.56	63.68	333.58	25.2	63.48	11.39	177.02	811.66	20.55	514.29		380.93	32.23	14.49	1126.27	1.43	21.17	22.04	142.6	499.11	35.93		1322.49	19.1	2018.73	2635.69
WT-5	serum	Wild type		19.54	439.58	66.08	34.78	19.38	25.65	17.25	92.21	309.99	555.93	780.19	400.67	159.73	812.65	150.75	75.56	1743.54	16.96	60.52	91.6	310.42	26.86	58.66	14.91	345.28	1065.84	34.93	451.42		365.25	40.8	17.8	2718.39	1.69	111.79	27.7	275.07	24377.4	31.95		2445.64	101.52	4609.62	9994.3
WT-6	serum	Wild type		16.42	503.81	69.4	43.57	26.09	26.92	19.02	55.1	164.36	724.44	989.42	745.08	156.07	1303.68	102.15	151.26	1473.34	60.6	57.01	49.47	350.64	31.48	76.68	25.39	337.21	1019.09	11.22	509.8		210.06	39.28	17.3	1143.48	0.81	10.17	22.38	341.18	2929.18	78.8		4172.65	929.39	6314.01	5133.79
WT-7	serum	Wild type		39.03	646.33	180.84	101.84	52.6	43.09	34.41	226.19	315.84	1383.92	1594.25	1332.63	253.6	1692.4	243.78	206.21	1630.22	85.48	103.16	91.76	510.08	48.72	143.81	41.04	470.07	1543.69	43.8	990.16		274.32	38.54	16.8	1202.58	1.36	32.18	20.29	556.12	9819.25	127.35		2356.69	220.69	4077.11	3267.7
WT-8	serum	Wild type		41.66	631.98	182.47	90.2	52.33	51.04	41.91	227.27	336.95	1280.81	1476.97	2533.93	244.29	2262.18	199.89	267.05	1689.19	161.16	109.64	92.89	498.26	71.19	142.63	74.37	1077.31	1442.25	44.41	997.16		284.39	44.38	18.51	1008.64	1.73	43.32	23.9	1084.25	18370.1	295.81		1875.89	247.57	2420.84	3731.01
GNV-3	serum	Gulo-/- with 0% ascorbate		11.38	127.07	OOR <	16.41	11.17	10.13	16.85	98.73	236.87	284.31	615.04	310.94	66.44	336.9	118.06	OOR <	1433.63	13.27	19.31	0.87	198.2	14.74	31.15	10.44	379.21	500.17	18.88	294.77		32.95	39.16	16.51	567.93	7.89	45	30.97	740.27	1495.98	48.54		OOR <	39.96	83.06	6698.53
GNV-4	serum	Gulo-/- with 0% ascorbate		15	313.79	80.34	42.15	21.23	21.84	16.04	96.56	369.96	480.42	683.17	1266.62	148.33	1152.41	106	132.87	1716	71.2	48.37	56.03	249.98	18.25	58.66	38.14	595.7	726.4	31.27	455.9		204.41	50.07	14.28	614.17	2.49	37.49	28.35	606.25	14983.7	146.51		733.85	242.58	538.1	6858.95
GNV-5	serum	Gulo-/- with 0% ascorbate		10.47	416.53	25.92	23.03	20.86	16.26	17.93	142.1	264.6	504	719.07	255.25	78.32	449.78	64.25	155.98	1526.57	14.09	39.44	42.21	274.64	19.02	36.45	6.72	181.79	641.95	22.63	446.93		135.57	26.7	23.18	516.27	7.39	44.3	32.55	83.85	304.68	28.55		553.9	53.28	45.96	2964.44
GNV-6	serum	Gulo-/- with 0% ascorbate		21.23	526.14	114.39	46.71	28.61	34.43	26.66	183.13	282.79	661.64	967.72	280.66	178.51	433.5	109.85	83.4	1584.78	15.52	73.21	44.53	333.58	29.8	73.88	11.27	208.84	1072.39	32.69	618.1		135.57	30.4	8.41	442.66	11.78	38.09	26.61	130.35	13242.4	26.01		no serum	no serum	no serum	no serum
GNV-8	serum	Gulo-/- with 0% ascorbate		4.95	305.66	22.55	14.77	10.93	15.4	27.65	100.91	147.7	306.75	493.43	185.62	144.27	246.2	69.87	54.13	1807.92	9.63	27.22	18.21	184.62	12.4	28.69	2.83	79.42	141.49	12.3	357.4		221.27	50.18	21.13	1193.54	27.2	46.64	34.54	36.93	2774.15	20.68		1206.35	162.38	256.28	19422.7
GNV-9	serum	Gulo-/- with 0% ascorbate		8.93	313.79	20.31	15.32	12	16.7	86.08	105.25	295.98	385.31	514.86	219.35	133.51	206.21	77.4	OOR <	1459.01	10.64	22.86	80.35	198.2	11.37	30.33	7.33	276.05	OOR <	14.66	330.56		109.52	34.92	14.35	771.32	17.42	72.2	23.77	223.27	3510.27	19		542.38	47.66	132.9	5612.71
GNV-10	serum	Gulo-/- with 0% ascorbate		3.42	353.92	13.17	9.89	17.91	15.4	26.24	94.38	308.82	456.96	744.23	172.52	60.61	209.89	69.87	97.56	1790.25	8.44	34.02	57.99	268.54	15.4	34.41	3.6	180.2	361.88	14.23	397.66		127.69	36.62	9.38	428.46	12.97	12.81	25.62	43.31	67.75	19		587.9	30.83	39.03	3315.83
GNV-11	serum	Gulo-/- with 0% ascorbate		4.7	321.89	14.53	13.68	14.51	11.46	18.2	87.86	236.87	352.03	604.29	206.43	70.27	316.37	54.95	106.18	1264.44	11.65	26.41	72.92	211.5	10.35	30.33	6.41	151.66	141.49	14.23	330.56		110.58	41.52	13.77	OOR <	7.8	2.28	19.63	148.64	361.22	21.52		579.73	36.96	201.49	4411.47
G-1	serum	Gulo-/- with 0.01% ascorbate		11.12	385.44	43.2	43.86	16.45	20.56	11.31	150.74	248.79	508.31	686.76	320.99	120.73	513.96	85.92	97.56	1408.39	22.76	36.19	41.22	247.89	16.92	61.07	12.45	189.73	611.69	26.35	491.82		104.17	30	15.79	758.44	0.98	5.02	23.24	130.35	481.22	30.81		1903.04	52.5	4744.51	4395.94
G-2	serum	Gulo-/- with 0.01% ascorbate		17.2	522.43	75.46	24.7	27.09	29.02	20.93	131.27	252.26	549.4	801.78	653.91	112.64	859.53	81.18	OOR <	1939.91	32.46	47.02	53.41	545.07	90.38	67.08	15.96	324.31	OOR <	26.97	446.93		63.38	33.65	11	1828.04	1.56	11.26	24.16	190.75	4445.06	64.77		1979.92	594.42	10916.8	12967.7
G-5	serum	Gulo-/- with 0.01% ascorbate		9.06	416.53	33.34	37.04	19.87	19.71	8.51	124.78	258.43	555.93	643.71	462.21	95.66	684.31	101.19	97.56	1692.81	30.13	44.85	40.22	254.14	17.02	57.06	13.98	243.99	641.95	30.76	455.9		162.65	31.65	10.71	719.86	0.62	17.88	21.83	151.04	977.29	53.16		2466.22	170.51	5848.04	13703.6
G-6	serum	Gulo-/- with 0.01% ascorbate		30.23	703.26	131.73	111.16	49.13	54.08	35.14	245.54	263.83	1351.05	1608.93	788.1	146.71	865.36	204.9	211.86	1849.79	44.69	103.16	62.87	526.83	45.58	117.65	22.1	382.45	1173.2	36.14	869.55		87.05	35.81	14.57	1414.86	0.94	21.76	23.31	249.45	6938.07	83.79		472.04	278.78	2555.24	2076.91
G-7	serum	Gulo-/- with 0.01% ascorbate		19.93	492.58	98.18	72.49	32.42	38.16	21.76	178.81	258.43	1045.87	1018.36	566.98	193.65	653.91	147.8	159.08	1880.42	27.38	67.54	39.73	389.51	32.17	82.27	14.56	240.79	1012.28	44.51	672.56		162.98	40.74	15	1012.71	0.81	14.04	24.29	102.46	2641.67	52.59		3244.88	435.73	5562.28	6029.4
G-9	serum	Gulo-/- with 0.01% ascorbate		10.6	353.92	34.2	18.06	16.69	19.71	20.38	105.25	447.81	335.5	686.76	479.35	98.09	617.12	152.72	OOR <	1966.97	25.07	17.67	44.2	247.89	15.97	43.35	13.86	335.59	547.07	18.04	375.29		137.61	48.17	21.27	618.16	14.29	48.26	28.06	194.17	1666.23	51.43		183.96	38	386.37	3295.54
G-10	serum	Gulo-/- with 0.01% ascorbate		12.67	458.62	93.85	34.78	32.42	24.81	21.62	170.18	317.4	801.81	783.79	804.81	171.15	992.09	93.54	OOR <	2111.83	45.98	39.17	43.7	411.21	25.59	62.68	25.21	505.89	OOR <	28.81	516.54		74.25	36.43	12.32	655.73	3.73	34.72	25.18	312.61	5050.07	118.41		745.04	212.7	324.99	2360.06
G-11	serum	Gulo-/- with 0.01% ascorbate		19.15	566.67	127.61	67.23	36.15	38.57	29.36	174.5	384.17	922.46	808.98	816.73	225.71	675.21	136.05	74.2	1483.99	37.16	84.27	76.48	314.31	33.46	89.84	26.48	359.81	1046.01	39.68	690.76		44.66	29.21	10.26	742.35	1.98	32.5	22.64	426.17	18940.3	69.44		1637.21	424.05	615.1	4211.17
GV-2	serum	Gulo-/- with 0.4% ascorbate		4.19	313.79	31.04	16.96	14.75	17.13	5.57	98.73	248.41	339.63	650.88	275.6	84.57	526.64	49.41	OOR <	1652.28	17.99	13.55	56.03	241.6	9.8	40.92	8.29	223.2	OOR <	14.02	312.67		76.54	29.34	4.7	654.13	0.4	10.17	21.56	81.12	339.84	31.95		2525.79	227.11	8483.85	3473.33
GV-3	serum	Gulo-/- with 0.4% ascorbate		23.31	551.99	84.62	71.02	36.28	37.33	21.76	202.52	292.87	885.04	1108.95	759.43	173.2	1257.25	141.92	178.89	1465.37	71.2	73.48	58.15	436.09	29.31	106.54	27.75	330.75	1209.31	44.81	736.36		175.38	47.71	19.65	1527.21	1.53	31.03	23.7	365.29	1797.61	77.04		3731.21	201.16	4435.88	3818.85
GV-4	serum	Gulo-/- with 0.4% ascorbate		11.89	289.28	50.85	37.61	18.64	18.42	7.27	144.26	268.08	491.12	572.07	550	119.11	806.76	107.92	50.51	1498.94	33.31	31.3	34.72	245.8	17.11	53.03	13.74	242.39	421.84	25.73	402.14		158.7	47.83	16.8	OOR <	0.4	9.03	22.24	216.63	1325.83	50.85		3941.47	150.21	7271.41	4395.94
GV-5	serum	Gulo-/- with 0.4% ascorbate		9.06	321.89	63.37	24.14	16.21	17.56	10.79	126.94	239.94	414.66	622.21	341.02	114.05	469.18	95.45	95.31	1510.73	18.61	36.19	32.54	245.8	14.46	40.92	7.81	204.06	141.49	17.41	415.57		210.06	53.23	17.94	822.92	0.89	76.78	26.73	93.25	363.88	36.22		2865.26	166.97	2571.19	3003.64
GV-6	serum	Gulo-/- with 0.4% ascorbate		44.29	469.99	91.38	243.9	55.56	22.69	13.65	226.19	273.88	17881.1	982.18	331.02	146.1	601.68	151.73	108.25	2138.63	18.61	163.23	42.88	1154.1	1063.61	63.48	9.01	223.2	407.56	386.67	516.54		101.66	25.94	7.74	1055.12	0.62	15.9	27.76	122.88	1729.86	40.5		3007	351.07	6699.44	4026.8
GV-7	serum	Gulo-/- with 0.4% ascorbate		5.21	251.79	6.8	21.92	14.27	13.43	3.92	55.1	283.95	381.13	539.88	227.08	132.09	256.92	94.49	46.67	1666.68	14.7	17.67	27.99	202.67	14.18	44.16	7.21	263.21	250.71	19.82	348.45		177.64	42.06	20.85	635.73	0.62	18.31	25.62	69.99	890.3	33.37		1279.8	156.49	2380.21	4151.65
GV-8	serum	Gulo-/- with 0.4% ascorbate		14.35	424.23	93.54	49	25.84	28.18	12.6	146.42	250.72	733.48	924.37	385.81	126.61	644.74	107.92	127.51	1545.17	29.28	45.39	50.13	278.68	21.42	66.68	14.91	293.72	859.47	27.17	532.3		176.02	31.84	11.29	978.52	0.89	16.35	22.1	165.28	1503.77	42.79		1541.59	539.23	2406.73	4362.11
GV-9	serum	Gulo-/- with 0.4% ascorbate		49.04	514.99	60.97	78.07	32.55	27.76	13.65	208.98	273.11	2167.58	960.49	360.97	127.22	644.74	139.96	150.46	2071.91	22.35	115.04	53.08	352.52	48.72	75.48	14.68	245.59	912.67	58.78	622.63		17.35	40.25	12.61	964.7	OOR <	28.51	24.73	152.23	1941.02	45.38		2451.73	106.09	7333.28	3237.43
	Mean	wild type mouse		21.6312	489.721	78.2713	49.945	29.5725	29.9188	23.1462	119.809	247.555	784.824	978.883	797.625	149.57	1172.81	186.504	162.693	1605.36	53.3925	62.0413	75.8575	365.096	35.2712	83.3475	23.5963	365.795	1095.46	25.8325	625.296		366.185	41.3225	16.9712	1307.59	1.295	34.835	22.9825	339.134	7238.72	82.9112		1977.5	199.998	2824.62	4178.36
	Mean	Gulo null with 0% ascorbate		10.01	334.849	41.6014	22.745	17.1525	17.7025	29.4562	113.615	267.949	428.928	667.726	362.174	110.032	418.907	83.7812	105.02	1572.83	19.305	36.355	46.6388	239.907	16.4163	40.4875	10.8425	256.609	512.253	20.1112	403.985		134.695	38.6962	15.1262	647.764	11.8675	37.3512	27.755	251.609	4592.53	41.2262		700.685	87.6643	185.26	7040.66
	Mean	Gulo null with 0.01% ascorbate		16.245	487.431	79.6963	51.165	28.7775	30.5775	21.1262	160.134	303.89	758.791	879.884	611.635	145.542	732.686	125.412	128.052	1791.76	33.2037	54.9838	50.2287	367.106	34.6362	72.625	18.075	322.82	838.7	31.4075	564.919		104.594	35.7075	13.865	968.769	3.11375	23.18	24.0887	219.625	5142.49	65.55		1579.04	275.836	3869.17	6130.04
	Mean	Gulo null with 0.4% ascorbate		20.1675	392.244	60.3213	67.8275	26.7625	22.8125	11.1513	151.143	266.37	2911.72	795.129	403.866	127.869	650.989	111.1	108.229	1693.71	28.2563	61.9813	44.44	394.657	152.326	61.4013	12.925	253.265	600.436	74.3012	485.832		136.669	39.775	13.9475	948.333	0.764286	25.76	24.305	158.334	1236.51	44.7625		2667.98	237.291	5197.75	3808.72
	STDEV	wild type mouse		12.2036	112.643	66.3303	29.4918	14.7146	11.0216	10.6553	71.0368	69.3751	372.163	393.024	787.898	71.2549	569.265	50.188	65.7657	169.414	50.5335	31.0034	27.276	102.315	17.2	38.3435	23.9492	312.046	301.646	13.861	240.415		142.944	12.9413	3.93157	627.916	0.38752	34.1637	4.49104	344.944	9413.85	93.3397		1046.37	308.739	1988.21	2762.48
	STDEV	Gulo null with 0% ascorbate		5.99132	112.572	39.5859	13.9245	6.21359	7.62448	23.3793	32.5595	64.9016	123.569	150.841	368.495	45.9952	310.573	23.871	36.0188	190.021	21.0997	17.6174	26.6491	51.053	6.22786	16.61	11.4088	163.235	335.192	8.0224	103.72		58.5215	8.45776	5.12847	267.112	7.62973	21.5152	4.89144	269.467	6019.34	43.6363		257.198	82.0982	175.013	5670.19
	STDEV	Gulo null with 0.01% ascorbate		6.98004	112.248	39.846	30.7755	11.1828	12.224	8.62678	43.3158	74.4312	335.673	316.548	184.624	47.5642	157.674	42.7569	56.4493	244.308	8.70111	28.0255	13.2534	121.657	24.7532	23.2351	5.61576	99.47	268.436	8.39755	164.609		45.3382	6.28675	3.66197	433.862	4.62589	14.3156	1.90993	106.958	5994.21	26.3773		1048.7	196.601	3668.88	4621.17
	STDEV	Gulo null with 0.4% ascorbate		17.4443	112.812	30.4253	74.6303	14.3024	7.84916	5.67913	58.8504	18.4472	6078.09	221.403	171.925	25.4939	292.314	33.3387	49.0511	264.32	18.4426	52.6303	11.5786	315.843	368.419	22.2781	6.7939	41.6543	395.254	127.113	144.113		65.1103	9.83864	5.82041	302.127	0.392635	22.0473	2.29144	96.7872	634.635	14.4828		938.758	142.324	2538.89	521.446
OOR< out of range
Metabolites with a Kruskal-Wallis P-value < 0.01 are highlighted in yellow
List of acronyms
IL-1a	Interleukin-1 alpha
IL-1b	Interluekin-1 beta
IL-2	Interleukin-2
IL-3	Interleukin-3
IL-4	Interleukin-4
IL-5	Interleukin-5
IL-6	Interleukin-6
IL-10	Interleukin-10
IL-12	Interleukin-12
IL-13	Interleukin-13
IL-15	Interleukin-15
IL-17	Interleukin-17
IL-18	Interleukin-18
G-CSF	Granulocyte-colony stimulating factor
GM-CSF	Granulocyte-macrophage colony-stimulating factor
M-CSF	Macrophage colony-stimulating factor
LIF	Leukemia Inhibitory Factor
IFN-g	Interferon gamma
KC	Katacalcin
MCP-1	Monocyte Chemotactic Protein 1
MIP-1a	Macrophage Inflammatory Protein 1 alpha
MIP-1b	Macrophage Inflammatory Protein 1 beta
MIP-2	Macrophage Inflammatory Protein 2
MIG	Monokine Induced by IFN Gamma
RANTES	regulated on activation, normal T cell expressed and secreted
TNF-a	Tumor Necrosis Factor-alpha
sICAM-1	secreted InterCellular Adhesion Molecule 1
Pecam-1	Platelet endothelial cell adhesion molecule-1
PAI-1	Plasminogen Activator Inhibitor-1
proMMP-9	pro Matrix MetalloPeptidase 9
FGF-basic	Fibroblast Growth Factor-basic
PDGF-bb	Platelet-Derived Growth Factor (BB chains)
VEGF	Vascular Endothelial Growth Factor
C-peptide 2	Connecting-peptide 2
GIP	Gastric Inhibitory Polypeptide
