# Supplementary material for: Vitamin C modulates the metabolic and cytokine profiles, alleviates hepatic endoplasmic reticulum stress, and increases the life span of Gulo−/− mice
Source: Aging (Albany NY). 2016 Feb 20;8(3):458–83. doi: 10.18632/aging.100902 (PMC4833140; doi:10.18632/aging.100902)
Supplement: Supplementary file 5 [file aging-08-458-s005.xlsx]

## Sheet: Table S4
Table S4. Pearson's correlation r values between body weight and serum metabolites
Metabolites*\Phenotypes	Median life span	Total body weight	Visceral weight
Histamine	-0.828983	-0.96169	-0.946191
Spermine	-0.79146	-0.996634	-0.98764
lysoPC a C18:0	0.548675	0.958082	0.973503
lysoPC a C18:2	0.474459	0.940796	0.962588
PC aa C36:1	0.527677	0.953729	0.971115
PC aa C40:2	0.686835	0.989239	0.992162
PC aa C40:3	0.604099	0.979062	0.989395
PC aa C40:4	0.673555	0.98547	0.989096
PC aa C42:4	0.726881	0.983987	0.981602
PC ae C34:3	0.688543	0.968007	0.968782
PC ae C40:2	0.516764	0.95851	0.97713
PC ae C42:4	0.49041	0.948633	0.969566
Hexoses (H1)	0.634205	0.987578	0.995586
15S-HETE	-0.795892	-0.993594	-0.982818
6-keto-PGF1a	-0.839071	-0.97496	-0.95923
PAI-1	-0.882638	-0.964462	-0.942904
*Metabolites and cytokines are from figures 2 and 4.
Pearson's correlation r values with a P-value < 0.05 are highlighted in yellow.
Pearson's correlation r values with a P-value < 0.01 are highlighted in orange.
